# Supplementary material for: Photo-induced solvent-enabled catalyst-/additive-free selective C(α)–C(β) bond cleavage of β-O-4 ketone lignin model compounds at room temperature
Source: Royal Society of Chemistry journal article supplement (doi:10.1039/d4gc05578k), 2025-01-01

**Photo-Induced solvent-enabled catalyst-/additive-free  
selective C( $\alpha$ )-C( $\beta$ ) bond cleavage of  $\beta$ -O-4 ketone lignin  
model compounds at room temperature**

**Ke Liu,<sup>a</sup> Zhaolun Ma,<sup>a</sup> Mingjing Deng,<sup>a</sup> Tongtong Ma,<sup>a</sup> Shengying Li,<sup>a</sup>  
Qingsheng Qi<sup>a</sup> and Longyang Dian<sup>\*a,b</sup>**

**a** State Key Laboratory of Microbial Technology, Institute of Microbial Technology,  
Shandong University, No. 72 Binhai Avenue, Qingdao 266237 (P. R. China),

**b** Suzhou Institute of Shandong University  
No. 388 Ruoshui Road, Suzhou Industrial Park, Suzhou 215123 (P. R. China)

\*Corresponding author: longyang\_dian@sdu.edu.cn.

## Content of the supporting information

|                                                                                                                        |    |
|------------------------------------------------------------------------------------------------------------------------|----|
| 1. General Information.....                                                                                            | 3  |
| 2. Light source test report .....                                                                                      | 4  |
| 3. Experimental Section .....                                                                                          | 5  |
| 3.1 Control experiment to explore the mechanism. ....                                                                  | 5  |
| 3.2 Light on/off experiment.....                                                                                       | 10 |
| 3.3 Electron paramagnetic resonance (EPR) spectra.....                                                                 | 10 |
| 3.4 Detailed optimization of the reaction conditions <sup>a</sup> .....                                                | 11 |
| 3.5 General procedure for the photo-induced C( $\alpha$ )-C( $\beta$ ) cleavage of the lignin model<br>compounds ..... | 12 |
| 3.6 Data and references. ....                                                                                          | 12 |
| 4. References.....                                                                                                     | 25 |
| 5. Selected NMR Spectra.....                                                                                           | 26 |

## 1. General Information

<sup>1</sup>H NMR spectra were recorded on 600 MHz or 400 MHz spectrometers. The chemical shifts were reported in parts per million ( $\delta$ ) relative to internal standard TMS (0 ppm) for CDCl<sub>3</sub>. The peak patterns are indicated as follows: s, singlet; d, doublet; dd, doublet of doublet; t, triplet; m, multiplet; q, quartet. The coupling constants, *J*, are reported in Hertz (Hz). <sup>13</sup>C NMR spectra were obtained at 151 MHz or 100 MHz spectrometers and referenced to the internal solvent signals (central peak is 77.0 ppm in CDCl<sub>3</sub>). CDCl<sub>3</sub> was used as the NMR solvent. Shimadzu GCMS-QP2010SE was used to monitor the reaction process. Bruker EMXplus was used to measure the Electron Paramagnetic Resonance (EPR). The reaction was performed in a Quartz tube. Organic solutions were concentrated by rotary evaporation below 40 °C in vacuum with carefully control of the vacuum.

All the reagents (including the aromatic sulfonyl chlorides) and solvents were purchased as reagent grade and were used without further purification. The lignin model compounds **1aa**, **1ab**, **1ac**, **1ad**, **1ae**, **1af**, **1ag**, **1ah**, **1ba**, **1ca**, **1cd**, **1da**, **1dd**, **1ea**, **1ed**, **1fa**, **4aa**, **4ac**, **4da**, **4de**, **4ae** and **4ah** were synthesized based on the literature reports.<sup>7</sup> Flash column chromatography was performed over silica gel 200-300 mesh and the eluent was a mixture of petroleum ether (PE)/ethyl acetate (EtOAc) as shown in detailed procedure.

## 2. Light source test report

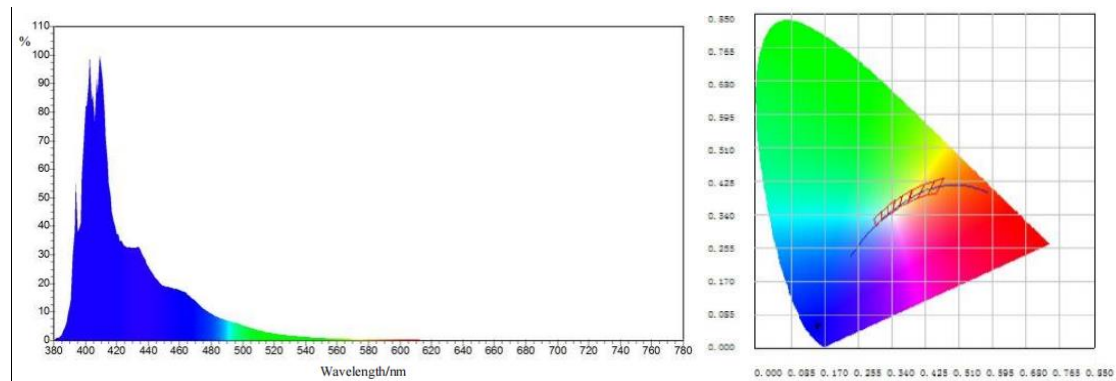

|                                |                                 |                           |                                 |              |                           |
|--------------------------------|---------------------------------|---------------------------|---------------------------------|--------------|---------------------------|
| Chromaticity coordinates       | X=0.1582                        | y=0.0607/u=01855          | V=0.1067                        | Duv=-0.1085  |                           |
| Correlated color temperature   | Tc=100000 K                     | dominant wavelength       | $\lambda_d=462.1$ nm            | color purity | Purity-90.1%              |
| color ratio                    | R=0.3%<br>G=4.0%<br>B=95.7%     | peak wavelength           | $\lambda_p=409.6$ nm            | half width   | $\Delta\lambda_d=18.6$ nm |
| Color rendering index: Ra=-2.5 |                                 |                           |                                 |              |                           |
| R1=9.2                         | R2 =37.9                        | R3 =-53.3                 | R4=-46.6                        | R5=20.5      |                           |
| R6=10.4                        | R7 =13.7                        | R8=-11.4                  | R9 =-230.1                      | R10=-45.0    |                           |
| R11=-75.5                      | R12=-69.4                       | R13=24.7                  | R14=15.2                        | R15=34.0     |                           |
| Photometric parameters:        |                                 |                           |                                 |              |                           |
| Luminous flux                  | $\Phi=14.833$ Lm                | light micro<br>5.606 Lm/W | 5.606 Lm/W $\Phi_e = 508.82$ mW |              |                           |
| Electrical parameters          |                                 |                           |                                 |              |                           |
| Forward Voltage: VF=3.78 V     | Forward current:<br>IF=700.0 mA |                           | Power P=2.646 W                 |              |                           |

**Figure S1.** LED Spectral Test Report

### 3. Experimental Section

#### 3.1 Control experiment to explore the mechanism.

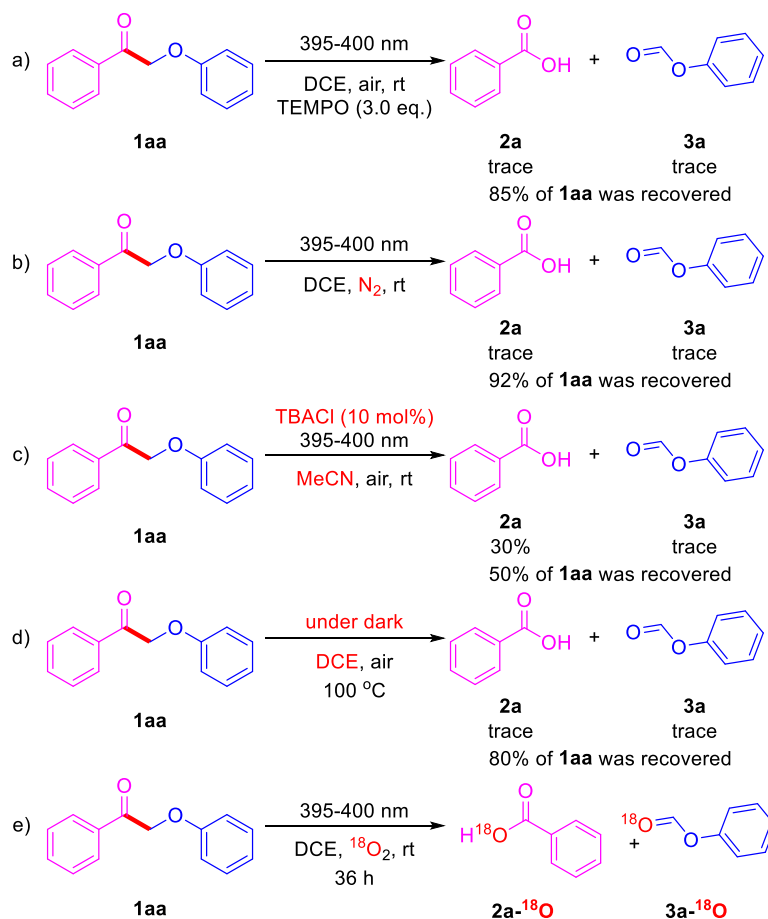

**Scheme S1.** Control experiments to explore the possible mechanism. Conditions: The reaction was performed with standard condition open to air unless otherwise noted. Substrate **1aa** (21.2 mg, 0.1 mmol) in DCE (1 mL, 0.1 M) under 395-400 nm light irradiation. a) TEMPO (46.8 mg, 0.3 mmol) was added; b) the reaction was performed under N<sub>2</sub> atmosphere. c) TBACl in MeCN (0.1 M, 1 mL) irradiated at 395-400 nm at air atmosphere for 24 h. d) The reaction was performed in the dark. e) the reaction was performed in the <sup>18</sup>O<sub>2</sub> atmosphere.

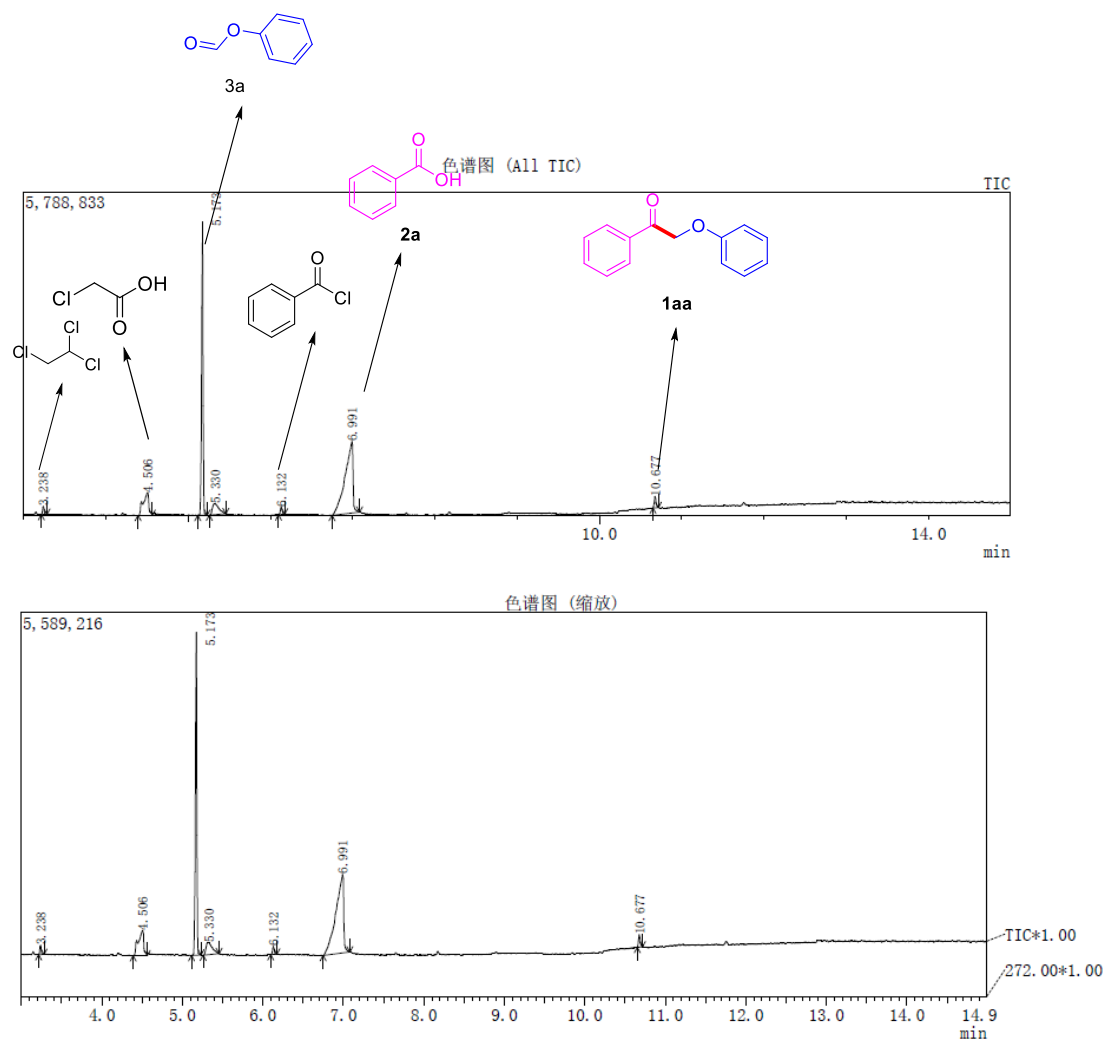

**Figure S2.** GC-MS trace of reaction in Scheme S1-a.

GC-MS method:

| entry      | Rate (°C/min) | Final Temperature (°C) | Keep time (min) |
|------------|---------------|------------------------|-----------------|
| 0          | -             | 50                     | 2               |
| 1          | 25.0          | 280                    | 3.8             |
| Total time |               |                        | 15              |

The column: Rtx-5MS, film thickness: 0.25  $\mu\text{m}$ , length: 30 m, inside diameter: 0.25 mm

流路号:1 保留时间:3.250(扫描数:31)  
质量峰:447  
原始模式:单个 3.250(31) 基峰:96.90(10233)  
背景模式:无 组 1 - 事件 1 Scan

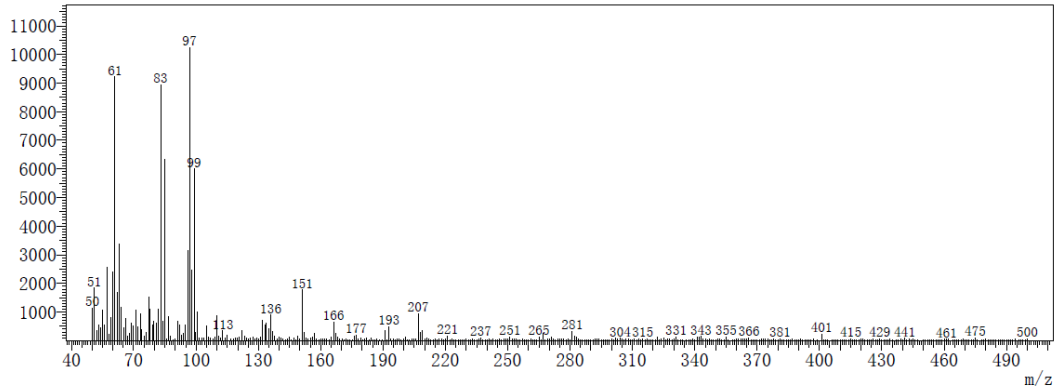

流路号:1 保留时间:4.500(扫描数:181)  
质量峰:439  
原始模式:单个 4.500(181) 基峰:50.00(203710)  
背景模式:无 组 1 - 事件 1 Scan

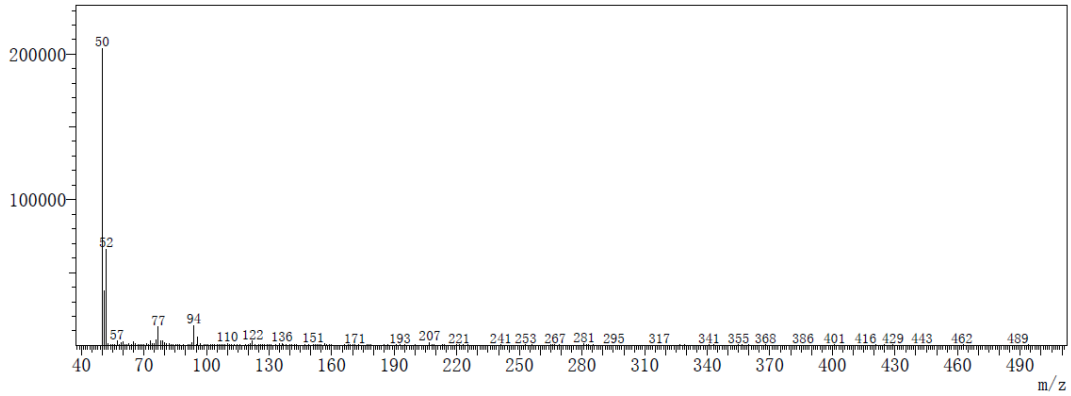

流路号:1 保留时间:5.183(扫描数:263)  
质量峰:442  
原始模式:单个 5.183(263) 基峰:94.00(664788)  
背景模式:无 组 1 - 事件 1 Scan

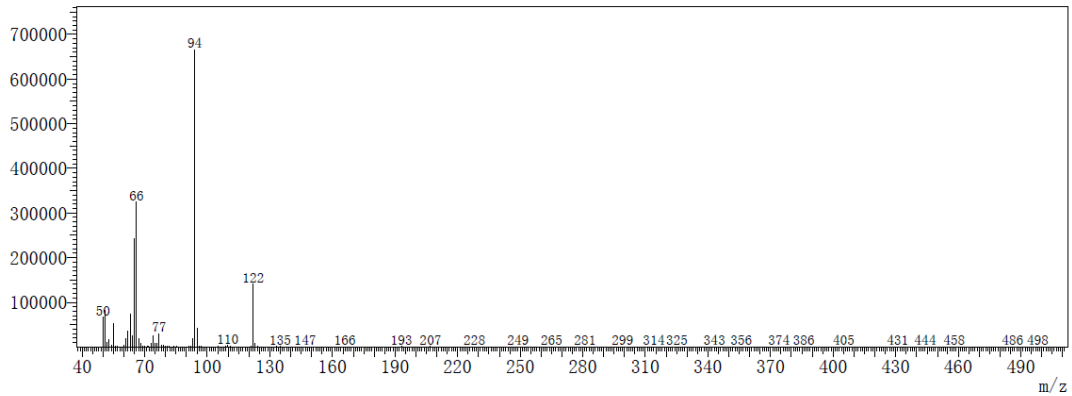

流路号:1 保留时间:6.908(扫描数:470)  
质量峰:445  
原始模式:单个 6.908(470) 基峰:105.05(165344)  
背景模式:无 组 1 - 事件 1 Scan

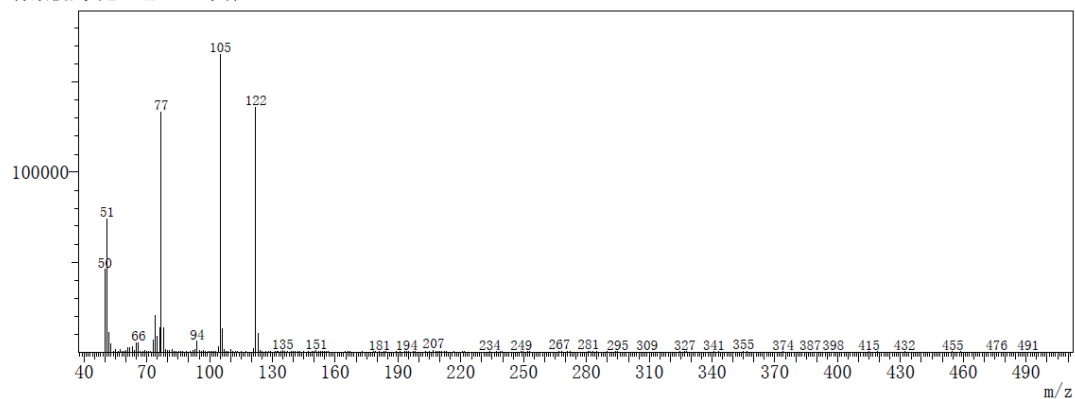

流路号:1 保留时间:10.675(扫描数:922)  
质量峰:448  
原始模式:单个 10.675(922) 基峰:105.00(82796)  
背景模式:无 组 1 - 事件 1 Scan

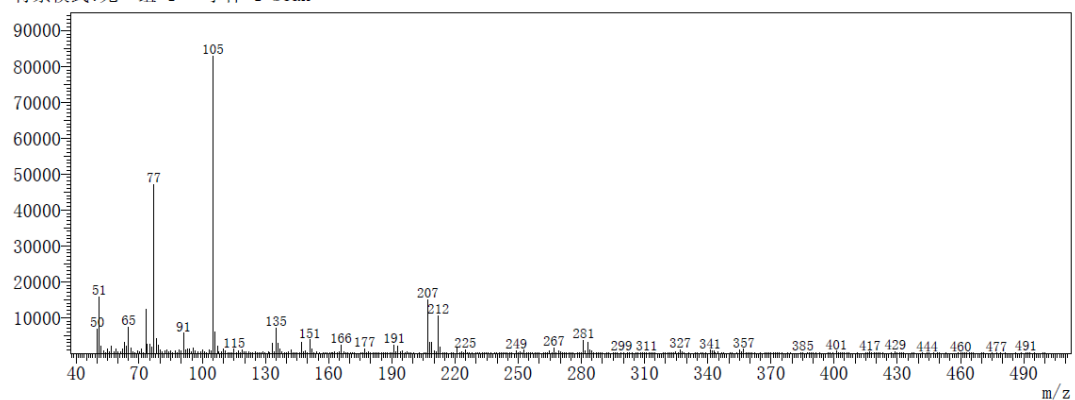

**Figure S3.** MS spectrum details of the trace of reaction in Scheme S1-a.



Phenyl formate **3a-<sup>18</sup>O**: C<sub>7</sub>H<sub>7</sub>O<sup>18</sup>O<sup>+</sup> calc: 125.0483, exp. 125.0482

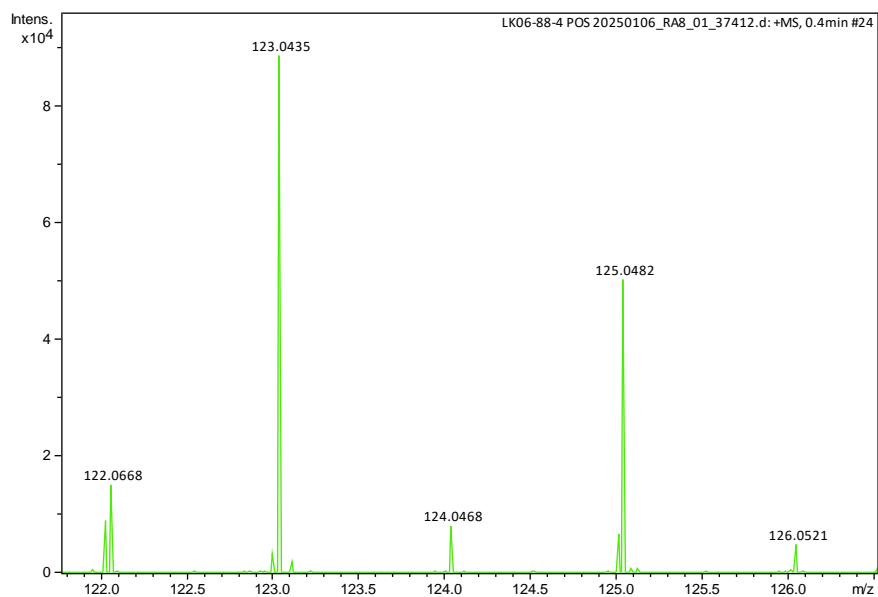

HRMS of the <sup>18</sup>O<sub>2</sub>-labeled reaction product

Benzoyl **2a-<sup>18</sup>O**: C<sub>7</sub>H<sub>5</sub>O<sup>18</sup>O<sup>-</sup> calc: 123.0332, exp. 123.0340

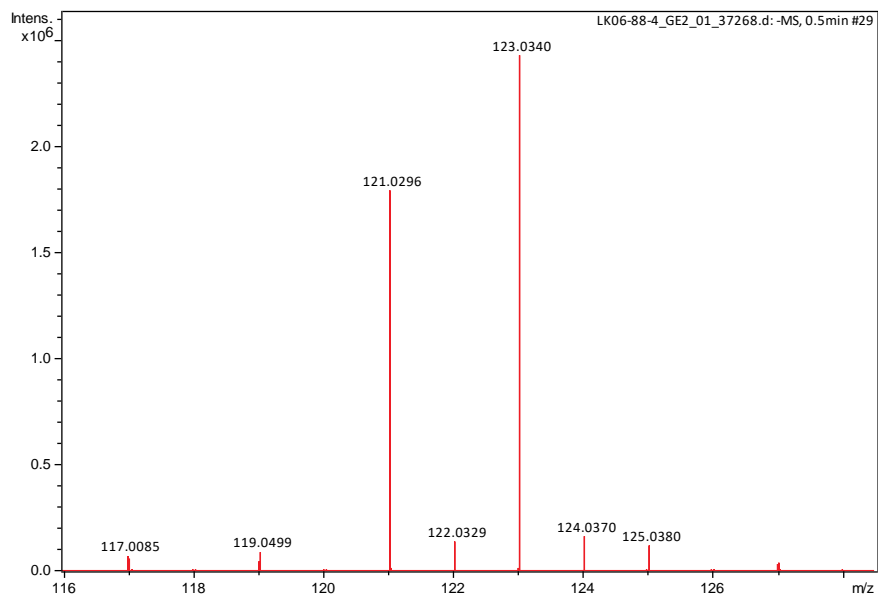

**Figure S4.** HRMS of the <sup>18</sup>O<sub>2</sub>-labeled reaction product.

### 3.2 Light on/off experiment

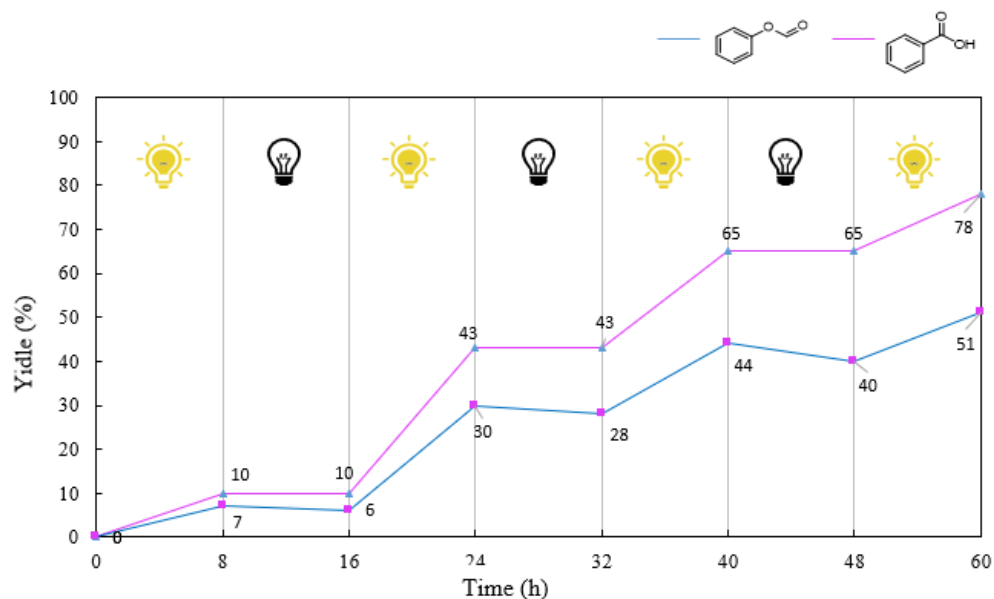

**Figure S5.** Light On-Off Experiments. The reaction was performed with **1aa** as substrate in DCE for light on/off per 8 h. The reaction process was monitored by GC-MS.

### 3.3 Electron paramagnetic resonance (EPR) spectra.

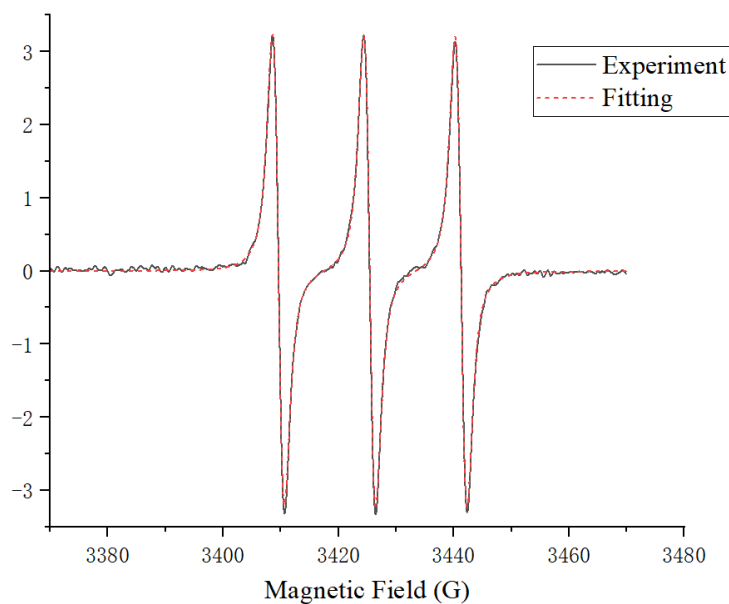

**Figure S6.** The electron paramagnetic resonance (EPR) Spectra UV-vis absorption spectra. After irradiated at 395-400 nm for 12 h, TEMP was added and the reaction was further stirred for 10 min and then the EPR reaction was conducted.

### 3.4 Detailed optimization of the reaction conditions<sup>a</sup>

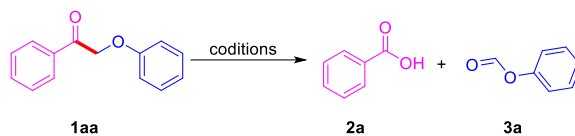

| Entry           | Light             | Solvent           | Conversion (%) | Yield (%) <sup>b</sup>  |
|-----------------|-------------------|-------------------|----------------|-------------------------|
| 1               | 400-410 nm        | Toluene           | 15             | Trace                   |
| 2               | 400-410 nm        | MeCN              | 20             | Trace                   |
| 3               | 400-410 nm        | PhCl              | 25             | Trace                   |
| 4               | 400-410 nm        | DMSO              | /              | ND                      |
| 5               | 400-410 nm        | DMA               | /              | ND                      |
| 6               | 400-410 nm        | NMP               | /              | ND                      |
| 7               | 400-410 nm        | MeOH              | /              | ND                      |
| 8               | 400-410 nm        | EtOAc             | /              | ND                      |
| 9               | 400-410 nm        | Dioxane           | /              | ND                      |
| 10              | 400-410 nm        | DCE               | 85             | <b>2a: 70%; 3a: 59%</b> |
| <b>11</b>       | <b>395-400 nm</b> | <b>DCE</b>        | <b>99</b>      | <b>2a: 72%; 3a: 61%</b> |
| 12              | 390-395 nm        | DCE               | 95             | <b>2a: 71%; 3a: 60%</b> |
| 13              | 380-385 nm        | DCE               | 90             | <b>2a: 65%; 3a: 51%</b> |
| 14              | 5 W blue LED      | DCE               | /              | <b>2a: 25%; 3a: 15%</b> |
| 15              | 365 nm            | DCE               | 50             | ND                      |
| 16              | yellow LED        | DCE               | /              | ND                      |
| 17              | green LED         | DCE               | /              | ND                      |
| 18              | white LED         | DCE               | /              | ND                      |
| 19 <sup>c</sup> | /                 | DCE               | /              | ND                      |
| 20 <sup>d</sup> | /                 | DCE               | /              | ND                      |
| 21 <sup>e</sup> | 395-400 nm        | DCE               | Trace          | Trace                   |
| 22 <sup>f</sup> | 100 °C            | DCE               | /              | ND                      |
| 23              | 395-400 nm        | DCM               | /              | ND                      |
| 24              | 395-400 nm        | CHCl <sub>3</sub> | 78%            | <b>2a: 56%; 3a: 27%</b> |
| 25              | 395-400 nm        | CCl <sub>4</sub>  | /              | ND                      |

<sup>[a]</sup> Unless otherwise noted, the reaction was carried out with **1aa** (0.05 mmol) in solvent (0.50 mL, 0.1 M) under the irradiation of indicated light. <sup>[b]</sup> Yields refer to the isolated products. <sup>[c]</sup> under dark, rt. <sup>[d]</sup> under dark, 100 °C. <sup>[e]</sup> N<sub>2</sub> atmosphere. <sup>[f]</sup> N<sub>2</sub> atmosphere, under dark, 100 °C.

### 3.5 General procedure for the photo-induced C( $\alpha$ )-C( $\beta$ ) cleavage of the lignin model compounds

The substrate  $\beta$ -O-4 ketone lignin model compound **1** (0.10 mmol) was dissolved in DCE (1.0 mL, 0.1 M) in a quartz tube. The reaction mixture was then stirred at room temperature with the irradiation under 395-400 nm light (3W, 2 cm distance). The process of the reaction was monitored by TLC and GC-MS (about 36 h). Upon completion, the solution was transferred to a random flask. Then the solvent was removed under vacuum and the residue was purified by silica gel chromatography with petroleum ether (PE)/ethyl acetate (EtOAc) as mobile phase to afford the corresponding products **2** and **3**.

### 3.6 Data and references.

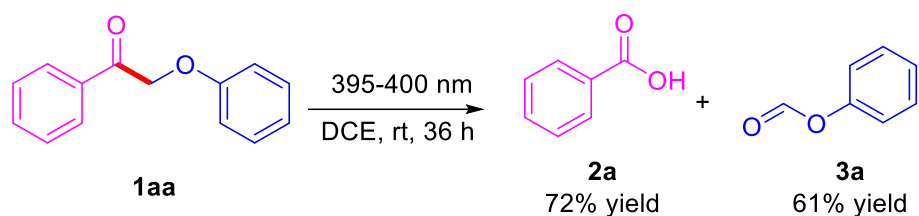

Lignin model compound **1aa**:  $^1\text{H NMR}$  (400 MHz,  $\text{CDCl}_3$ )  $\delta$  8.04 (dd,  $J = 8.4, 1.4$  Hz, 2H), 7.64 (t,  $J = 7.4$  Hz, 1H), 7.53 (t,  $J = 7.6$  Hz, 2H), 7.32 (dd,  $J = 8.7, 7.3$  Hz, 2H), 7.04 - 6.96 (m, 3H), 5.30 (s, 2H).  $^{13}\text{C NMR}$  (101 MHz,  $\text{CDCl}_3$ )  $\delta$  194.5, 158.0, 134.6, 133.8, 129.5, 128.8, 128.1, 121.6, 114.8, 70.7.

Lignin model compound **1aa** (21.2 mg, 0.10 mmol) was used under standard condition irradiated for 36 h at 395-400 nm. After worked up and purification, the corresponding cleaved products were afforded, benzoic acid **2a** (8.8 mg, 72% yield), phenyl formate **3a** (7.4 mg, 61% yield).

Benzoic acid **2a**<sup>[1]</sup>:  $^1\text{H NMR}$  (400 MHz,  $\text{CDCl}_3$ )  $\delta$  8.34 - 8.12 (m, 2H), 7.76 - 7.62 (m, 1H), 7.62 - 7.48 (m, 2H).  $^{13}\text{C NMR}$  (101 MHz,  $\text{CDCl}_3$ )  $\delta$  172.5, 133.8, 130.2, 129.3, 128.5.

Phenyl formate **3a**<sup>[2]</sup>:  $^1\text{H NMR}$  (600 MHz,  $\text{CDCl}_3$ )  $\delta$  8.18 (s, 1H), 7.29 (dd,  $J = 8.5, 7.4$  Hz, 2H), 7.17 - 7.13 (m, 1H), 7.05 - 7.00 (m, 2H).  $^{13}\text{C NMR}$  (151 MHz,  $\text{CDCl}_3$ )  $\delta$  159.2, 149.8, 129.6, 126.3, 121.0.

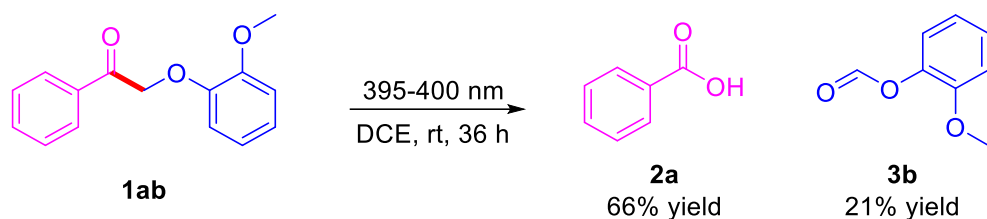

Lignin model compound **1ab**:  $^1\text{H NMR}$  (400 MHz,  $\text{CDCl}_3$ )  $\delta$  8.07 - 7.99 (m, 2H), 7.63 (t,  $J = 7.4$  Hz, 1H), 7.51 (t,  $J = 7.7$  Hz, 2H), 7.00 (dt,  $J = 8.5, 4.4$  Hz, 1H), 6.94 (d,  $J = 7.9$  Hz, 1H), 6.88 (d,  $J = 3.6$  Hz, 2H), 5.37 (s, 2H), 3.90 (s, 3H).  $^{13}\text{C NMR}$  (101 MHz,  $\text{CDCl}_3$ )  $\delta$  194.5, 149.8, 147.5, 134.6, 133.7, 128.7, 128.1, 122.5, 120.8, 114.9, 112.2, 72.1, 55.9.

Lignin model compound **1ab** (24.2 mg, 0.10 mmol) was used under standard condition irradiated for 36 h at 395-400 nm. After worked up and purification, the corresponding cleaved products were afforded, benzoic acid **2a** (8.1 mg, 66% yield), *ortho*-methoxyl phenyl formate **3b** (3.2 mg, 21% yield).

Benzoic acid **2a**<sup>[1]</sup>:  $^1\text{H NMR}$  (400 MHz,  $\text{CDCl}_3$ )  $\delta$  8.34 - 8.12 (m, 2H), 7.76 - 7.62 (m, 1H), 7.62 - 7.48 (m, 2H).  $^{13}\text{C NMR}$  (101 MHz,  $\text{CDCl}_3$ )  $\delta$  172.5, 133.8, 130.2, 129.3, 128.5.

Phenyl formate **3b**<sup>[3]</sup>:  $^1\text{H NMR}$  (600 MHz,  $\text{CDCl}_3$ )  $\delta$  8.28 (s, 1H), 7.25 (ddd,  $J = 9.1, 7.6, 1.7$  Hz, 1H), 7.12 (dd,  $J = 7.8, 1.6$  Hz, 1H), 7.03 - 6.97 (m, 2H), 3.84 (s, 3H).  $^{13}\text{C NMR}$  (151 MHz,  $\text{CDCl}_3$ )  $\delta$  159.1, 150.7, 138.7, 127.2, 122.4, 120.7, 112.4, 55.6.

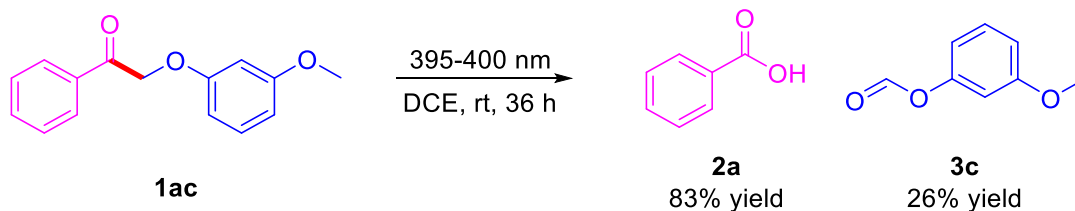

Lignin model compound **1ac**:  $^1\text{H NMR}$  (400 MHz,  $\text{CDCl}_3$ )  $\delta$  8.10 - 8.03 (m, 2H), 7.66 - 7.58 (m, 1H), 7.50 (dd,  $J = 8.4, 7.1$  Hz, 2H), 7.15 (t,  $J = 8.2$  Hz, 1H), 6.55 - 6.48 (m, 2H), 5.59 (dd,  $J = 6.0, 4.0$  Hz, 1H), 4.21 - 4.10 (m, 2H), 3.75 (s, 3H).  $^{13}\text{C NMR}$  (101 MHz,  $\text{CDCl}_3$ )  $\delta$  196.6, 160.9, 158.4, 134.7, 134.0, 130.0, 128.8, 128.7, 107.6, 107.0, 102.0, 81.0, 63.1, 55.2.

Lignin model compound **1ac** (24.2 mg, 0.10 mmol) was used under standard condition irradiated for 36 h at 395-400 nm. After worked up and purification, the corresponding cleaved products were afforded, benzoic acid **2a** (10.1 mg, 83% yield), phenyl formate **3c** (4.0 mg, 26% yield).

Lignin model compound **2a**<sup>[1]</sup>:  $^1\text{H NMR}$  (400 MHz,  $\text{CDCl}_3$ )  $\delta$  8.34 - 8.12 (m, 2H), 7.76 - 7.62 (m, 1H), 7.62 - 7.48 (m, 2H).  $^{13}\text{C NMR}$  (101 MHz,  $\text{CDCl}_3$ )  $\delta$  172.5, 133.8, 130.2, 129.3, 128.5.

Lignin model compound **3c**<sup>[4]</sup>:  $^1\text{H NMR}$  (600 MHz,  $\text{CDCl}_3$ )  $\delta$  8.29 (s, 1H), 7.30 (t,  $J = 8.2$  Hz, 1H), 6.83 (ddd,  $J = 8.4, 2.5, 0.9$  Hz, 1H), 6.76 - 6.73 (m, 1H), 6.71 (t,  $J = 2.4$  Hz, 1H), 3.79 (s, 3H).  $^{13}\text{C NMR}$  (151 MHz,  $\text{CDCl}_3$ )  $\delta$  160.5, 159.2, 150.7, 129.9, 113.0, 111.9, 107.0, 55.2.

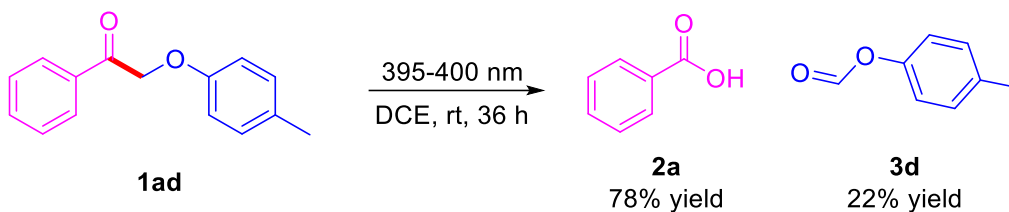

Lignin model compound **1ad**:  $^1\text{H NMR}$  (400 MHz,  $\text{CDCl}_3$ )  $\delta$  8.07 - 7.99 (m, 2H), 7.64 (t,  $J = 7.4$  Hz, 1H), 7.52 (dd,  $J = 8.5, 7.0$  Hz, 2H), 7.11 (d,  $J = 8.4$  Hz, 2H), 6.88 (d,  $J = 8.6$  Hz, 2H), 5.27 (s, 2H), 2.31 (s, 3H).  $^{13}\text{C NMR}$  (101 MHz,  $\text{CDCl}_3$ )  $\delta$  194.7, 155.9, 134.6, 133.8, 130.9, 130.0, 128.8, 128.1, 114.6, 71.0, 20.4.

Lignin model compound **1ad** (22.6 mg, 0.10 mmol) was used under standard condition irradiated for 36 h at 395-400 nm. After worked up and purification, the corresponding cleaved products were afforded, benzoic acid **2a** (9.5 mg, 78% yield), phenyl formate **3d** (3.0 mg, 22% yield).

Product **2a**<sup>[1]</sup>:  $^1\text{H NMR}$  (400 MHz,  $\text{CDCl}_3$ )  $\delta$  8.34 - 8.12 (m, 2H), 7.76 - 7.62 (m, 1H), 7.62 - 7.48 (m, 2H).  $^{13}\text{C NMR}$  (101 MHz,  $\text{CDCl}_3$ )  $\delta$  172.5, 133.8, 130.2, 129.3, 128.5.

Product **3d**<sup>[4]</sup>:  $^1\text{H NMR}$  (600 MHz,  $\text{CDCl}_3$ )  $\delta$  8.31 (s, 1H), 7.23 (d,  $J = 8.5$  Hz, 2H), 7.06 (d,  $J = 8.5$  Hz, 2H), 2.39 (s, 3H).  $^{13}\text{C NMR}$  (151 MHz,  $\text{CDCl}_3$ )  $\delta$  159.4, 147.6, 135.9, 130.0, 120.6, 20.6.

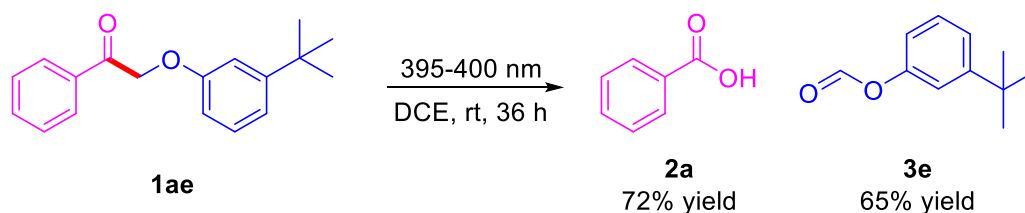

Lignin model compound **1ae**:  $^1\text{H NMR}$  (400 MHz,  $\text{CDCl}_3$ )  $\delta$  8.07 (d,  $J = 7.1$  Hz, 2H), 7.66 (t,  $J = 7.5$  Hz, 1H), 7.54 (t,  $J = 7.7$  Hz, 2H), 7.14 - 7.07 (m, 2H), 6.99 (d,  $J = 6.8$  Hz, 1H), 6.78 (dd,  $J = 8.1, 2.6$  Hz, 1H), 5.33 (s, 2H), 1.35 (d,  $J = 5.9$  Hz, 9H).  $^{13}\text{C NMR}$  (101 MHz,  $\text{CDCl}_3$ )  $\delta$  194.9, 157.7, 153.1, 134.5, 133.8, 128.9, 128.7, 128.0, 118.8, 117.3, 113.2, 112.6, 112.3, 110.5, 70.7, 34.6, 31.2.

Lignin model compound **1ae** (26.8 mg, 0.10 mmol) was used under standard condition irradiated for 36 h at 395-400 nm. After worked up and purification, the corresponding cleaved products were afforded, benzoic acid **2a** (8.8 mg, 72% yield), phenyl formate **3e** (11.6 mg, 65% yield).

Product **2a**<sup>[1]</sup>:  $^1\text{H NMR}$  (400 MHz,  $\text{CDCl}_3$ )  $\delta$  8.34 - 8.12 (m, 2H), 7.76 - 7.62 (m, 1H), 7.62 - 7.48 (m, 2H).  $^{13}\text{C NMR}$  (101 MHz,  $\text{CDCl}_3$ )  $\delta$  172.5, 133.8, 130.2, 129.3, 128.5.

Product **3e**:  $^1\text{H NMR}$  (600 MHz,  $\text{CDCl}_3$ )  $\delta$  8.19 (s, 1H), 7.32 (d,  $J = 8.7$  Hz, 2H), 6.96 (d,  $J = 8.7$  Hz, 2H), 1.23 (s, 9H).  $^{13}\text{C NMR}$  (151 MHz,  $\text{CDCl}_3$ )  $\delta$  159.5, 149.2, 147.5, 126.5, 120.4, 34.4, 31.3.

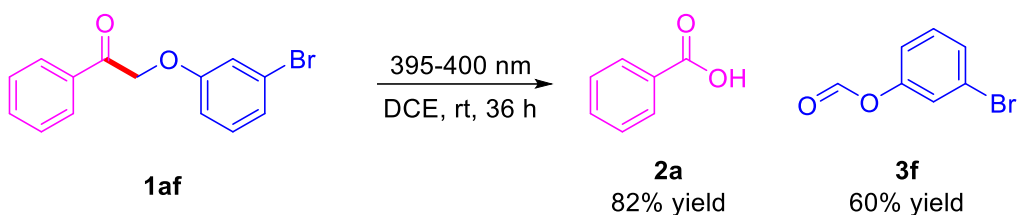

Lignin model compound **1af** (29.0 mg, 0.10 mmol) was used under standard condition irradiated for 36 h at 395-400 nm. After worked up and purification, the corresponding cleaved products were afforded, benzoic acid **2a** (10.0 mg, 82% yield), phenyl formate **3f** (12.0 mg, 60% yield).

Product **2a**<sup>11</sup>: <sup>1</sup>H NMR (400 MHz, CDCl<sub>3</sub>) δ 8.34 - 8.12 (m, 2H), 7.76 - 7.62 (m, 1H), 7.62 - 7.48 (m, 2H). <sup>13</sup>C NMR (101 MHz, CDCl<sub>3</sub>) δ 172.5, 133.8, 130.2, 129.3, 128.5.

Product **3f**: <sup>1</sup>H NMR (600 MHz, CDCl<sub>3</sub>) δ 8.15 (s, 1H), 7.30 (ddd, *J* = 8.0, 1.8, 0.9 Hz, 1H), 7.23 (t, *J* = 2.0 Hz, 1H), 7.16 (d, *J* = 8.2 Hz, 1H), 7.02 - 6.98 (m, 1H). <sup>13</sup>C NMR (151 MHz, CDCl<sub>3</sub>) δ 158.5, 150.1, 130.6, 129.5, 124.5, 122.5, 119.9.

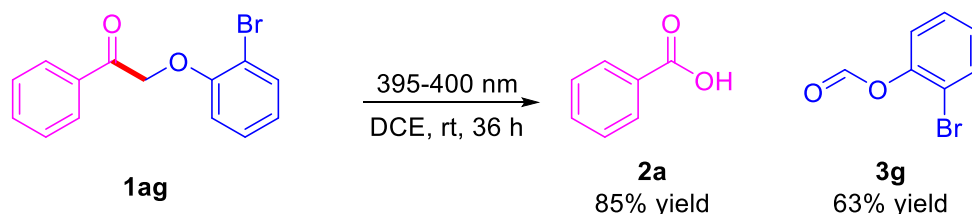

Lignin model compound **1ag**: <sup>1</sup>H NMR (400 MHz, CDCl<sub>3</sub>) δ 8.05 (d, *J* = 7.5 Hz, 2H), 7.64 (t, *J* = 7.4 Hz, 1H), 7.60 - 7.48 (m, 3H), 7.26 - 7.20 (m, 1H), 6.92 - 6.81 (m, 2H), 5.36 (s, 2H). <sup>13</sup>C NMR (101 MHz, CDCl<sub>3</sub>) δ 194.0, 154.5, 134.3, 133.9, 133.6, 128.8, 128.4, 128.2, 122.8, 113.8, 112.3, 71.8.

Lignin model compound **1ag** (29.0 mg, 0.10 mmol) was used under standard condition irradiated for 36 h at 395-400 nm. After worked up and purification, the corresponding cleaved products were afforded, benzoic acid **2a** (10.4 mg, 85% yield), phenyl formate **3g** (12.6 mg, 63% yield).

Product **2a**<sup>11</sup>: <sup>1</sup>H NMR (400 MHz, CDCl<sub>3</sub>) δ 8.34 - 8.12 (m, 2H), 7.76 - 7.62 (m, 1H), 7.62 - 7.48 (m, 2H). <sup>13</sup>C NMR (101 MHz, CDCl<sub>3</sub>) δ 172.5, 133.8, 130.2, 129.3, 128.5.

Product **3g**: <sup>1</sup>H NMR (600 MHz, CDCl<sub>3</sub>) δ 8.34 (d, *J* = 0.9 Hz, 1H), 7.66 (d, *J* = 8.0 Hz, 1H), 7.39 - 7.35 (m, 1H), 7.22 - 7.15 (m, 2H). <sup>13</sup>C NMR (151 MHz, CDCl<sub>3</sub>) δ 158.0, 158.0, 147.2, 133.5, 128.6, 128.6, 127.8, 123.4, 115.6.

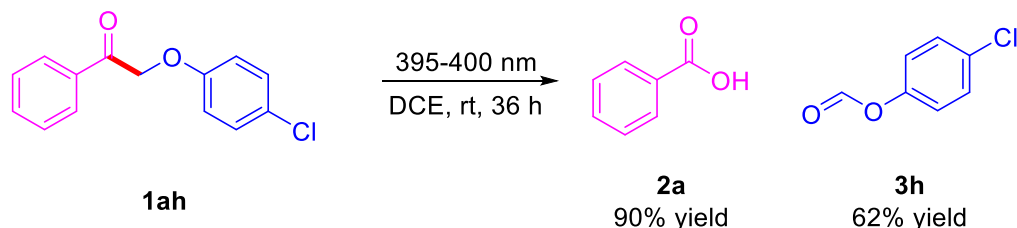

Lignin model compound **1ah**: <sup>1</sup>H NMR (400 MHz, CDCl<sub>3</sub>) δ 8.01 (d, *J* = 7.6 Hz, 2H), 7.65 (t, *J* = 7.3 Hz, 1H), 7.53 (t, *J* = 7.5 Hz, 2H), 7.25 (d, *J* = 8.3 Hz, 2H), 6.89 (d,

$J = 8.4$  Hz, 2H), 5.29 (s, 2H).  $^{13}\text{C}$  NMR (101 MHz,  $\text{CDCl}_3$ )  $\delta$  194.0, 156.6, 134.3, 134.0, 129.4, 128.9, 128.0, 126.5, 116.1, 116.1, 70.9.

Lignin model compound **1ah** (24.8 mg, 0.10 mmol) was used under standard condition irradiated for 36 h at 395-400 nm. After worked up and purification, the corresponding cleaved products were afforded, benzoic acid **2a** (11.0 mg, 90% yield), phenyl formate **3h** (9.7 mg, 62% yield).

Product **2a**<sup>[1]</sup>:  $^1\text{H}$  NMR (400 MHz,  $\text{CDCl}_3$ )  $\delta$  8.34 - 8.12 (m, 2H), 7.76 - 7.62 (m, 1H), 7.62 - 7.48 (m, 2H).  $^{13}\text{C}$  NMR (101 MHz,  $\text{CDCl}_3$ )  $\delta$  172.5, 133.8, 130.2, 129.3, 128.5.

Product **3h**<sup>[4]</sup>:  $^1\text{H}$  NMR (600 MHz,  $\text{CDCl}_3$ )  $\delta$  8.28 (s, 1H), 7.41 - 7.36 (m, 2H), 7.13 - 7.08 (m, 2H).  $^{13}\text{C}$  NMR (151 MHz,  $\text{CDCl}_3$ )  $\delta$  158.7, 148.2, 131.7, 129.6, 122.5.

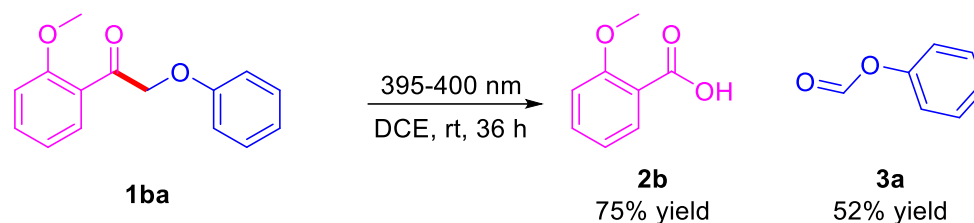

Lignin model compound **1ba**:  $^1\text{H}$  NMR (400 MHz,  $\text{CDCl}_3$ )  $\delta$  7.83 (dd,  $J = 7.8$ , 1.7 Hz, 1H), 7.46 - 7.39 (m, 1H), 7.20 - 7.15 (m, 2H), 6.97 - 6.85 (m, 3H), 6.82 (d,  $J = 8.1$  Hz, 2H), 5.14 (s, 2H), 3.84 (s, 3H).  $^{13}\text{C}$  NMR (101 MHz,  $\text{CDCl}_3$ )  $\delta$  195.3, 159.2, 158.2, 134.7, 130.8, 129.3, 124.8, 121.1, 121.0, 114.7, 111.5, 74.1, 55.5.

Lignin model compound **1ba** (24.2 mg, 0.10 mmol) was used under standard condition irradiated for 36 h at 395-400 nm. After worked up and purification, the corresponding cleaved products were afforded, benzoic acid **2b** (11.4 mg, 75% yield), phenyl formate **3a** (6.3 mg, 52% yield).

Product **2b**<sup>[5]</sup>:  $^1\text{H}$  NMR (400 MHz,  $\text{CDCl}_3$ )  $\delta$  7.76 (dt,  $J = 7.6$ , 1.3 Hz, 1H), 7.66 (dd,  $J = 2.7$ , 1.5 Hz, 1H), 7.41 (t,  $J = 8.0$  Hz, 1H), 7.19 (ddd,  $J = 8.2$ , 2.7, 1.0 Hz, 1H), 3.90 (s, 3H).  $^{13}\text{C}$  NMR (101 MHz,  $\text{CDCl}_3$ )  $\delta$  172.3, 159.6, 130.5, 129.5, 122.7, 120.5, 114.4, 55.4.

Product **3a**<sup>[2]</sup>:  $^1\text{H}$  NMR (600 MHz,  $\text{CDCl}_3$ )  $\delta$  8.18 (s, 1H), 7.29 (dd,  $J = 8.5$ , 7.4 Hz, 2H), 7.17 - 7.13 (m, 1H), 7.05 - 7.00 (m, 2H).  $^{13}\text{C}$  NMR (151 MHz,  $\text{CDCl}_3$ )  $\delta$  159.2, 149.8, 129.6, 126.3, 121.0.

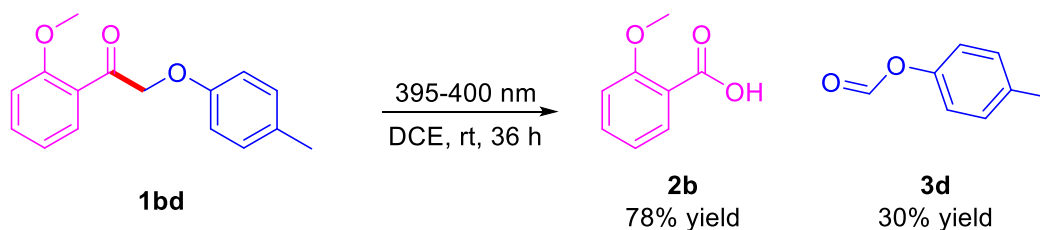

Lignin model compound **1bd**:  $^1\text{H}$  NMR (400 MHz,  $\text{CDCl}_3$ )  $\delta$  7.85 (dd,  $J = 7.8$ , 1.8 Hz, 1H), 7.50 - 7.41 (m, 1H), 7.01 - 6.91 (m, 4H), 6.76 - 6.71 (m, 2H), 5.13 (s, 2H), 3.87 (s, 3H), 2.20 (s, 3H).  $^{13}\text{C}$  NMR (101 MHz,  $\text{CDCl}_3$ )  $\delta$  195.6, 159.2, 156.2, 134.6, 131.0, 130.4, 129.8, 125.0, 121.1, 114.6, 111.5, 74.4, 55.6, 20.4.

Lignin model compound **1bd** (25.6 mg, 0.10 mmol) was used under standard



condition irradiated for 36 h at 395-400 nm. After worked up and purification, the corresponding cleaved products were afforded, benzoic acid **2b** (11.9 mg, 78% yield), phenyl formate **3d** (4.1 mg, 30% yield).

Product **2b**<sup>[5]</sup>: <sup>1</sup>H NMR (400 MHz, CDCl<sub>3</sub>) δ 7.76 (dt, *J* = 7.6, 1.3 Hz, 1H), 7.66 (dd, *J* = 2.7, 1.5 Hz, 1H), 7.41 (t, *J* = 8.0 Hz, 1H), 7.19 (ddd, *J* = 8.2, 2.7, 1.0 Hz, 1H), 3.90 (s, 3H). <sup>13</sup>C NMR (101 MHz, CDCl<sub>3</sub>) δ 172.3, 159.6, 130.5, 129.5, 122.7, 120.5, 114.4, 55.4.

Product **3d**<sup>[4]</sup>: <sup>1</sup>H NMR (600 MHz, CDCl<sub>3</sub>) δ 8.31 (s, 1H), 7.23 (d, *J* = 8.5 Hz, 2H), 7.06 (d, *J* = 8.5 Hz, 2H), 2.39 (s, 3H). <sup>13</sup>C NMR (151 MHz, CDCl<sub>3</sub>) δ 159.4, 147.6, 135.9, 130.0, 120.6, 20.6.

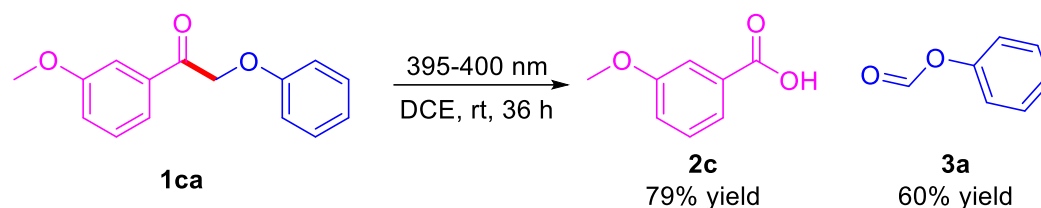

Lignin model compound **1ca**: <sup>1</sup>H NMR (400 MHz, CDCl<sub>3</sub>) δ 7.52 - 7.44 (m, 2H), 7.32 (t, *J* = 7.9 Hz, 1H), 7.24 - 7.18 (m, 2H), 7.08 (dd, *J* = 8.3, 2.5 Hz, 1H), 6.93 - 6.84 (m, 3H), 5.18 (s, 2H), 3.78 (s, 3H). <sup>13</sup>C NMR (101 MHz, CDCl<sub>3</sub>) δ 194.3, 159.9, 158.0, 135.8, 129.8, 129.5, 121.6, 120.5, 120.4, 114.8, 112.4, 70.8, 55.5.

Lignin model compound **1ca** (24.2 mg, 0.10 mmol) was used under standard condition irradiated for 36 h at 395-400 nm. After worked up and purification, the corresponding cleaved products were afforded, benzoic acid **2c** (12.0 mg, 79% yield), phenyl formate **3a** (7.3 mg, 60% yield).

Product **2c**<sup>[5]</sup>: <sup>1</sup>H NMR (400 MHz, CDCl<sub>3</sub>) δ 7.76 (dt, *J* = 7.6, 1.3 Hz, 1H), 7.66 (dd, *J* = 2.7, 1.5 Hz, 1H), 7.41 (t, *J* = 8.0 Hz, 1H), 7.19 (ddd, *J* = 8.2, 2.7, 1.0 Hz, 1H), 3.90 (s, 3H). <sup>13</sup>C NMR (101 MHz, CDCl<sub>3</sub>) δ 172.3, 159.6, 130.5, 129.5, 122.7, 120.5, 114.4, 55.4.

Product **3a**<sup>[2]</sup>: <sup>1</sup>H NMR (600 MHz, CDCl<sub>3</sub>) δ 8.18 (s, 1H), 7.29 (dd, *J* = 8.5, 7.4 Hz, 2H), 7.17 - 7.13 (m, 1H), 7.05 - 7.00 (m, 2H). <sup>13</sup>C NMR (151 MHz, CDCl<sub>3</sub>) δ 159.2, 149.8, 129.6, 126.3, 121.0.

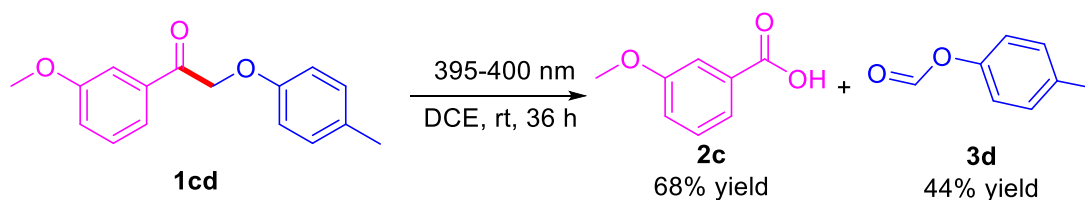

Lignin model compound **1cd**: <sup>1</sup>H NMR (400 MHz, CDCl<sub>3</sub>) δ 7.62 - 7.53 (m, 2H), 7.42 (t, *J* = 7.9 Hz, 1H), 7.18 (dd, *J* = 8.3, 2.6 Hz, 1H), 7.11 (d, *J* = 8.3 Hz, 2H), 6.87 (d, *J* = 8.5 Hz, 2H), 5.25 (s, 2H), 3.88 (s, 3H), 2.31 (s, 3H). <sup>13</sup>C NMR (101 MHz, CDCl<sub>3</sub>) δ 194.5, 159.9, 155.9, 135.9, 130.9, 130.0, 129.8, 120.5, 120.3, 114.6, 112.3, 71.0, 55.4, 20.4.

Lignin model compound **1cd** (25.6 mg, 0.10 mmol) was used under standard

condition irradiated for 36 h at 395-400 nm. After worked up and purification, the corresponding cleaved products were afforded, benzoic acid **2c** (10.3 mg, 68% yield), phenyl formate **3d** (6.0 mg, 44% yield).

Product **2c**<sup>[5]</sup>: <sup>1</sup>H NMR (400 MHz, CDCl<sub>3</sub>) δ 7.76 (dt, *J* = 7.6, 1.3 Hz, 1H), 7.66 (dd, *J* = 2.7, 1.5 Hz, 1H), 7.41 (t, *J* = 8.0 Hz, 1H), 7.19 (ddd, *J* = 8.2, 2.7, 1.0 Hz, 1H), 3.90 (s, 3H). <sup>13</sup>C NMR (101 MHz, CDCl<sub>3</sub>) δ 172.3, 159.6, 130.5, 129.5, 122.7, 120.5, 114.4, 55.4.

Product **3d**<sup>[4]</sup>: <sup>1</sup>H NMR (600 MHz, CDCl<sub>3</sub>) δ 8.31 (s, 1H), 7.23 (d, *J* = 8.5 Hz, 2H), 7.06 (d, *J* = 8.5 Hz, 2H), 2.39 (s, 3H). <sup>13</sup>C NMR (151 MHz, CDCl<sub>3</sub>) δ 159.4, 147.6, 135.9, 130.0, 120.6, 20.6.

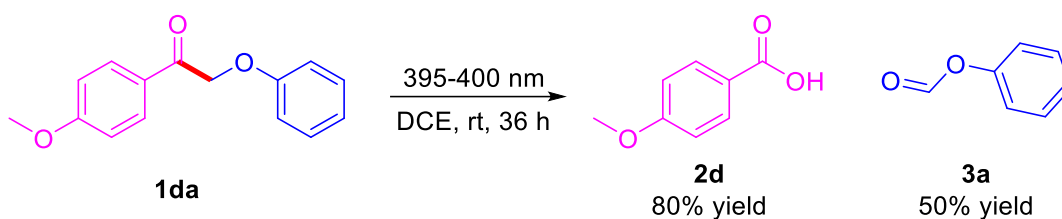

Lignin model compound **1da**: <sup>1</sup>H NMR (400 MHz, CDCl<sub>3</sub>) δ 8.03 (d, *J* = 8.9 Hz, 2H), 7.31 (dd, *J* = 8.8, 7.3 Hz, 2H), 6.99 (td, *J* = 8.7, 7.8, 6.5 Hz, 5H), 5.23 (s, 2H), 3.90 (s, 3H). <sup>13</sup>C NMR (101 MHz, CDCl<sub>3</sub>) δ 193.1, 164.0, 158.0, 130.5, 129.5, 127.6, 121.5, 114.7, 114.0, 70.6, 55.5.

Lignin model compound **1da** (24.2 mg, 0.10 mmol) was used under standard condition irradiated for 36 h at 395-400 nm. After worked up and purification, the corresponding cleaved products were afforded, benzoic acid **2d** (12.2 mg, 80% yield), phenyl formate **3a** (6.1 mg, 50% yield).

Product **2d**<sup>[5]</sup>: <sup>1</sup>H NMR (400 MHz, CDCl<sub>3</sub>) δ 8.10 (d, *J* = 8.9 Hz, 2H), 6.98 (d, *J* = 8.9 Hz, 2H), 3.91 (s, 3H). <sup>13</sup>C NMR (101 MHz, CDCl<sub>3</sub>) δ 171.5, 164.1, 132.4, 121.6, 113.8, 55.5.

Product **3a**<sup>[2]</sup>: <sup>1</sup>H NMR (600 MHz, CDCl<sub>3</sub>) δ 8.18 (s, 1H), 7.29 (dd, *J* = 8.5, 7.4 Hz, 2H), 7.17 - 7.13 (m, 1H), 7.05 - 7.00 (m, 2H). <sup>13</sup>C NMR (151 MHz, CDCl<sub>3</sub>) δ 159.2, 149.8, 129.6, 126.3, 121.0.

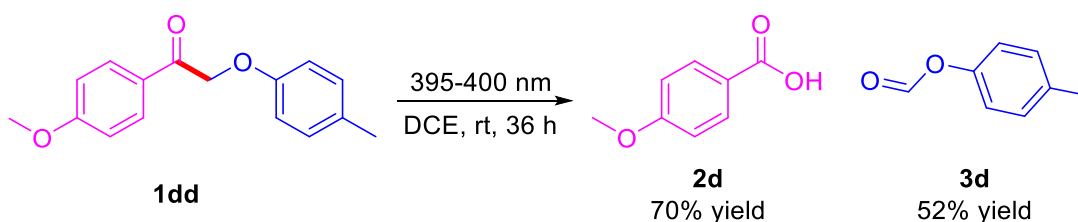

Lignin model compound **1dd** (25.6 mg, 0.10 mmol) was used under standard condition irradiated for 36 h at 395-400 nm. After worked up and purification, the corresponding cleaved products were afforded, benzoic acid **2d** (10.6 mg, 70% yield), phenyl formate **3d** (7.1 mg, 52% yield).

Product **2d**<sup>[5]</sup>: <sup>1</sup>H NMR (400 MHz, CDCl<sub>3</sub>) δ 8.10 (d, *J* = 8.9 Hz, 2H), 6.98 (d, *J* = 8.9 Hz, 2H), 3.91 (s, 3H). <sup>13</sup>C NMR (101 MHz, CDCl<sub>3</sub>) δ 171.5, 164.1, 132.4, 121.6, 113.8, 55.5.

Product **3d**<sup>[4]</sup>: <sup>1</sup>H NMR (600 MHz, CDCl<sub>3</sub>) δ 8.31 (s, 1H), 7.23 (d, *J* = 8.5 Hz,

2H), 7.06 (d,  $J = 8.5$  Hz, 2H), 2.39 (s, 3H).  $^{13}\text{C}$  NMR (151 MHz,  $\text{CDCl}_3$ )  $\delta$  159.4, 147.6, 135.9, 130.0, 120.6, 20.6.

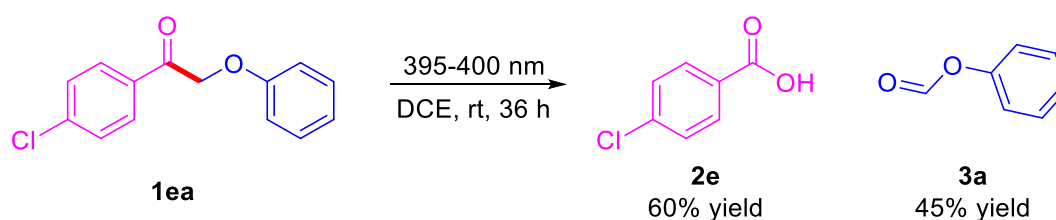

Lignin model compound **1ea**:  $^1\text{H}$  NMR (400 MHz,  $\text{CDCl}_3$ )  $\delta$  7.98 (d,  $J = 8.6$  Hz, 2H), 7.49 (d,  $J = 8.5$  Hz, 2H), 7.38 - 7.26 (m, 2H), 7.02 (t,  $J = 7.3$  Hz, 1H), 6.96 (d,  $J = 8.2$  Hz, 2H), 5.23 (s, 2H).  $^{13}\text{C}$  NMR (101 MHz,  $\text{CDCl}_3$ )  $\delta$  193.7, 157.8, 140.3, 132.8, 129.7, 129.6, 129.1, 121.8, 114.7, 70.8.

Lignin model compound **1ea** (24.7 mg, 0.10 mmol) was used under standard condition irradiated for 36 h at 395-400 nm. After worked up and purification, the corresponding cleaved products were afforded, benzoic acid **2e** (9.4 mg, 60% yield), phenyl formate **3a** (5.5 mg, 45% yield).

Product **2e**<sup>[5]</sup>:  $^1\text{H}$  NMR (600 MHz,  $\text{DMSO}-d_6$ )  $\delta$  7.97 (d,  $J = 8.1$  Hz, 2H), 7.58 (d,  $J = 8.2$  Hz, 2H).  $^{13}\text{C}$  NMR (151 MHz,  $\text{DMSO}-d_6$ )  $\delta$  166.5 (d,  $J = 3.2$  Hz), 137.9 (d,  $J = 3.3$  Hz), 131.2 (d,  $J = 3.3$  Hz), 129.7 (d,  $J = 3.1$  Hz), 128.8 (d,  $J = 3.0$  Hz).

Product **3a**<sup>[2]</sup>:  $^1\text{H}$  NMR (600 MHz,  $\text{CDCl}_3$ )  $\delta$  8.18 (s, 1H), 7.29 (dd,  $J = 8.5, 7.4$  Hz, 2H), 7.17 - 7.13 (m, 1H), 7.05 - 7.00 (m, 2H).  $^{13}\text{C}$  NMR (151 MHz,  $\text{CDCl}_3$ )  $\delta$  159.2, 149.8, 129.6, 126.3, 121.0.

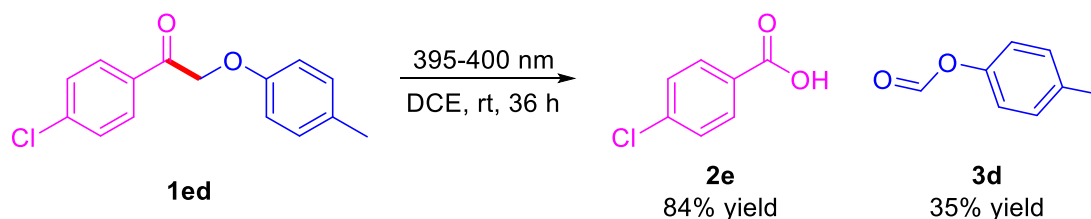

Lignin model compound **1ed**:  $^1\text{H}$  NMR (400 MHz,  $\text{CDCl}_3$ )  $\delta$  7.97 (d,  $J = 8.6$  Hz, 2H), 7.48 (d,  $J = 8.6$  Hz, 2H), 7.10 (d,  $J = 8.5$  Hz, 2H), 6.85 (d,  $J = 8.6$  Hz, 2H), 5.20 (s, 2H), 2.30 (s, 3H).  $^{13}\text{C}$  NMR (101 MHz,  $\text{CDCl}_3$ )  $\delta$  193.9, 155.7, 140.2, 132.9, 131.1, 130.0, 129.7, 129.1, 114.6, 71.1, 20.4.

Lignin model compound **1ed** (26.0 mg, 0.10 mmol) was used under standard condition irradiated for 36 h at 395-400 nm. After worked up and purification, the corresponding cleaved products were afforded, benzoic acid **2e** (13.1 mg, 84% yield), phenyl formate **3d** (4.8 mg, 35% yield).

Product **2e**<sup>[5]</sup>:  $^1\text{H}$  NMR (600 MHz,  $\text{DMSO}-d_6$ )  $\delta$  8.01 - 7.91 (m, 1H), 7.57 (dd,  $J = 12.3, 8.1$  Hz, 1H).  $^{13}\text{C}$  NMR (151 MHz,  $\text{DMSO}-d_6$ )  $\delta$  166.5 (d,  $J = 3.2$  Hz), 137.9 (d,  $J = 3.3$  Hz), 131.2 (d,  $J = 3.3$  Hz), 129.7 (d,  $J = 3.1$  Hz), 128.8 (d,  $J = 3.0$  Hz).

Product **3d**<sup>[4]</sup>:  $^1\text{H}$  NMR (600 MHz,  $\text{CDCl}_3$ )  $\delta$  8.31 (s, 1H), 7.23 (d,  $J = 8.5$  Hz,

2H), 7.06 (d,  $J = 8.5$  Hz, 2H), 2.39 (s, 3H).  $^{13}\text{C}$  NMR (151 MHz,  $\text{CDCl}_3$ )  $\delta$  159.4, 147.6, 135.8, 130.0, 120.6, 20.6.

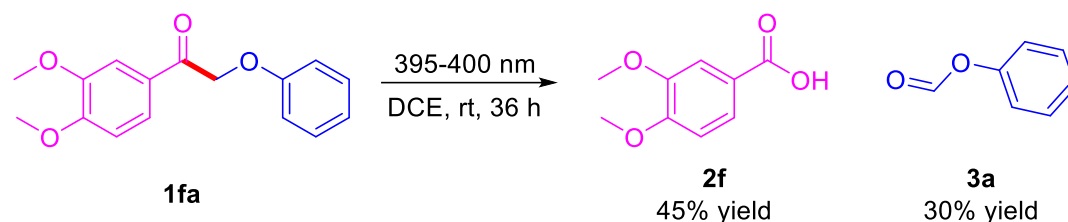

Lignin model compound **1fa**:  $^1\text{H}$  NMR (400 MHz,  $\text{CDCl}_3$ )  $\delta$  7.57 (dd,  $J = 8.5$ , 1.0 Hz, 1H), 7.49 (d,  $J = 1.9$  Hz, 1H), 7.20 (t,  $J = 7.6$  Hz, 2H), 6.86 (td,  $J = 16.0$ , 7.8 Hz, 4H), 5.14 (s, 2H), 3.86 (d,  $J = 8.7$  Hz, 6H).  $^{13}\text{C}$  NMR (101 MHz,  $\text{CDCl}_3$ )  $\delta$  193.1, 158.0, 153.8, 149.2, 129.5, 127.7, 122.8, 121.5, 114.7, 110.3, 110.1, 70.6, 56.0, 55.9.

Lignin model compound **1fa** (27.2 mg, 0.10 mmol) was used under standard condition irradiated for 36 h at 395-400 nm. After worked up and purification, the corresponding cleaved products were afforded, benzoic acid **2f** (8.2 mg, 45% yield), phenyl formate **3a** (3.7 mg, 30% yield).

Product **2f**<sup>6f</sup>:  $^1\text{H}$  NMR (400 MHz,  $\text{CDCl}_3$ )  $\delta$  7.80 (dd,  $J = 8.4$ , 2.0 Hz, 1H), 7.62 (d,  $J = 1.9$  Hz, 1H), 6.93 (d,  $J = 8.4$  Hz, 1H), 3.97 (d,  $J = 2.6$  Hz, 6H).  $^{13}\text{C}$  NMR (101 MHz,  $\text{CDCl}_3$ )  $\delta$  172.1, 153.7, 148.6, 124.6, 121.7, 112.2, 110.3, 56.0, 55.9.

Product **3a**<sup>2l</sup>:  $^1\text{H}$  NMR (600 MHz,  $\text{CDCl}_3$ )  $\delta$  8.18 (s, 1H), 7.29 (dd,  $J = 8.5$ , 7.4 Hz, 2H), 7.17 - 7.13 (m, 1H), 7.05 - 7.00 (m, 2H).  $^{13}\text{C}$  NMR (151 MHz,  $\text{CDCl}_3$ )  $\delta$  159.2, 149.8, 129.6, 126.3, 121.0.

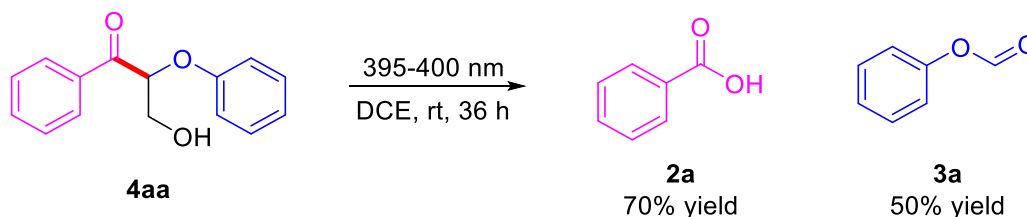

Lignin model compound **4aa**:  $^1\text{H}$  NMR (400 MHz,  $\text{CDCl}_3$ )  $\delta$  8.10 - 8.00 (m, 2H), 7.65 - 7.56 (m, 1H), 7.48 (t,  $J = 7.6$  Hz, 2H), 7.27 - 7.21 (m, 2H), 6.97 (t,  $J = 7.4$  Hz, 1H), 6.90 (d,  $J = 8.1$  Hz, 2H), 5.58 (dd,  $J = 6.1$ , 4.0 Hz, 1H), 4.21 - 4.06 (m, 2H), 2.49 (s, 1H).  $^{13}\text{C}$  NMR (101 MHz,  $\text{CDCl}_3$ )  $\delta$  196.7, 157.2, 134.7, 134.0, 129.7, 128.8, 128.7, 121.9, 115.3, 81.1, 63.2.

Lignin model compound **4aa** (24.2 mg, 0.10 mmol) was used under standard condition irradiated for 36 h at 395-400 nm. After worked up and purification, the corresponding cleaved products were afforded, benzoic acid **2a** (8.5 mg, 70% yield), phenyl formate **3a** (6.1 mg, 50% yield).

Product **2a**<sup>1l</sup>:  $^1\text{H}$  NMR (400 MHz,  $\text{CDCl}_3$ )  $\delta$  8.34 - 8.12 (m, 2H), 7.76 - 7.62 (m, 1H), 7.62 - 7.48 (m, 2H).  $^{13}\text{C}$  NMR (101 MHz,  $\text{CDCl}_3$ )  $\delta$  172.5, 133.8, 130.2, 129.3, 128.5.

Product **3a**<sup>[2]</sup>: <sup>1</sup>H NMR (600 MHz, CDCl<sub>3</sub>) δ 8.18 (s, 1H), 7.29 (dd, *J* = 8.5, 7.4 Hz, 2H), 7.17 - 7.13 (m, 1H), 7.05 - 7.00 (m, 2H). <sup>13</sup>C NMR (151 MHz, CDCl<sub>3</sub>) δ 159.2, 149.8, 129.6, 126.3, 121.0.

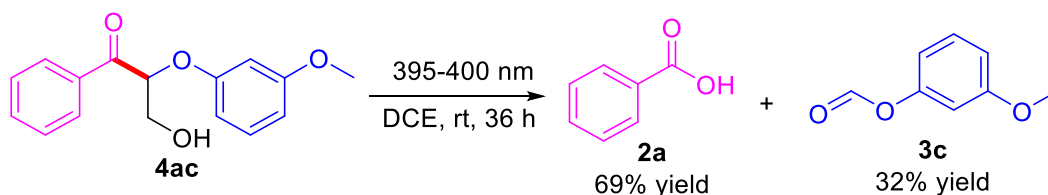

Lignin model compound **4ac**: <sup>1</sup>H NMR (400 MHz, CDCl<sub>3</sub>) δ 8.06 (d, *J* = 7.2 Hz, 2H), 7.66 - 7.57 (m, 1H), 7.49 (t, *J* = 7.8 Hz, 2H), 7.14 (t, *J* = 8.2 Hz, 1H), 6.59 - 6.45 (m, 3H), 5.59 (dd, *J* = 6.0, 4.0 Hz, 1H), 4.23 - 4.08 (m, 2H), 3.75 (s, 3H), 2.49 (d, *J* = 9.4 Hz, 1H). <sup>13</sup>C NMR (101 MHz, CDCl<sub>3</sub>) δ 196.6, 160.8, 158.4, 134.6, 134.0, 130.1, 128.8, 128.6, 107.6, 107.0, 101.9, 80.9, 63.1, 55.2.

Lignin model compound **4ac** (27.2 mg, 0.10 mmol) was used under standard condition irradiated for 36 h at 395-400 nm. After worked up and purification, the corresponding cleaved products were afforded, benzoic acid **2a** (8.4 mg, 69% yield), phenyl formate **3c** (4.9 mg, 32% yield).

Product **2a**<sup>[1]</sup>: <sup>1</sup>H NMR (400 MHz, CDCl<sub>3</sub>) δ 8.34 - 8.12 (m, 2H), 7.76 - 7.62 (m, 1H), 7.62 - 7.48 (m, 2H). <sup>13</sup>C NMR (101 MHz, CDCl<sub>3</sub>) δ 172.5, 133.8, 130.2, 129.3, 128.5.

Product **3c**<sup>[4]</sup>: <sup>1</sup>H NMR (600 MHz, CDCl<sub>3</sub>) δ 8.29 (s, 1H), 7.30 (t, *J* = 8.2 Hz, 1H), 6.83 (ddd, *J* = 8.4, 2.5, 0.9 Hz, 1H), 6.76 - 6.73 (m, 1H), 6.71 (t, *J* = 2.4 Hz, 1H), 3.79 (s, 3H). <sup>13</sup>C NMR (151 MHz, CDCl<sub>3</sub>) δ 160.5, 159.2, 150.7, 129.9, 113.0, 111.9, 107.0, 55.2.

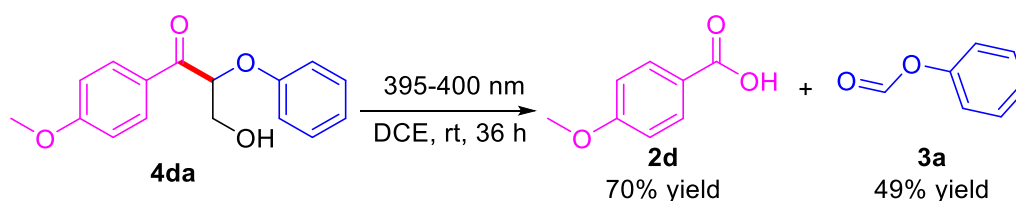

Lignin model compound **4da**: <sup>1</sup>H NMR (400 MHz, CDCl<sub>3</sub>) δ 8.06 (d, *J* = 7.2 Hz, 2H), 7.66 - 7.57 (m, 1H), 7.49 (t, *J* = 7.8 Hz, 2H), 7.14 (t, *J* = 8.2 Hz, 1H), 6.59 - 6.45 (m, 3H), 5.59 (dd, *J* = 6.0, 4.0 Hz, 1H), 4.23 - 4.08 (m, 2H), 3.75 (s, 3H), 2.49 (d, *J* = 9.4 Hz, 1H). <sup>13</sup>C NMR (101 MHz, CDCl<sub>3</sub>) δ 196.6, 160.8, 158.4, 134.6, 134.0, 130.1, 128.8, 128.6, 107.6, 107.0, 101.9, 80.9, 63.1, 55.2.

Lignin model compound **4da** (27.2 mg, 0.10 mmol) was used under standard condition irradiated for 36 h at 395-400 nm. After worked up and purification, the corresponding cleaved products were afforded, benzoic acid **2d** (10.6 mg, 70% yield), phenyl formate **3a** (6.0 mg, 49% yield).

Product **2d**<sup>[5]</sup>: <sup>1</sup>H NMR (400 MHz, CDCl<sub>3</sub>) δ 8.10 (d, *J* = 8.9 Hz, 2H), 6.98 (d, *J* = 8.9 Hz, 2H), 3.91 (s, 3H). <sup>13</sup>C NMR (101 MHz, CDCl<sub>3</sub>) δ 171.5, 164.1, 132.4, 121.6, 113.8, 55.5.

Product **3a**<sup>[2]</sup>: <sup>1</sup>H NMR (600 MHz, CDCl<sub>3</sub>) δ 8.18 (s, 1H), 7.29 (dd, *J* = 8.5, 7.4 Hz, 2H), 7.17 - 7.13 (m, 1H), 7.05 - 7.00 (m, 2H). <sup>13</sup>C NMR (151 MHz, CDCl<sub>3</sub>) δ 159.2, 149.8, 129.6, 126.3, 121.0.

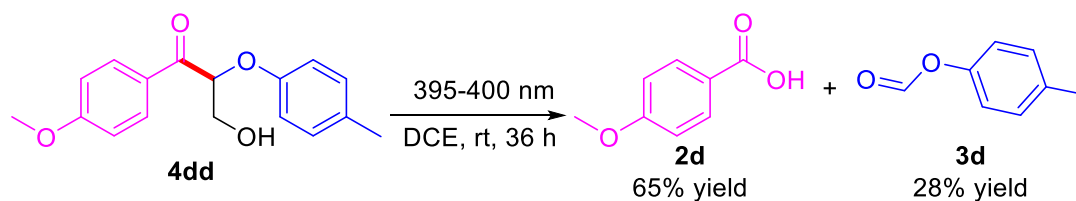

Lignin model compound **4dd**: <sup>1</sup>H NMR (400 MHz, CDCl<sub>3</sub>) δ 8.03 (d, *J* = 8.9 Hz, 2H), 7.31 (dd, *J* = 8.8, 7.3 Hz, 2H), 6.99 (td, *J* = 8.7, 7.8, 6.5 Hz, 5H), 5.23 (s, 2H), 3.90 (s, 3H). <sup>13</sup>C NMR (101 MHz, CDCl<sub>3</sub>) δ 193.1, 164.0, 158.0, 130.5, 129.5, 127.6, 121.5, 114.7, 114.0, 70.6, 55.5.

Lignin model compound **4dd** (28.6 mg, 0.10 mmol) was used under standard condition irradiated for 36 h at 395-400 nm. After worked up and purification, the corresponding cleaved products were afforded, benzoic acid **2d** (9.9 mg, 65% yield), phenyl formate **3d** (3.8 mg, 28% yield).

Product **2d**<sup>[5]</sup>: <sup>1</sup>H NMR (400 MHz, CDCl<sub>3</sub>) δ 8.10 (d, *J* = 8.9 Hz, 2H), 6.98 (d, *J* = 8.9 Hz, 2H), 3.91 (s, 3H). <sup>13</sup>C NMR (101 MHz, CDCl<sub>3</sub>) δ 171.5, 164.1, 132.4, 121.6, 113.8, 55.5.

Product **3d**<sup>[4]</sup>: <sup>1</sup>H NMR (600 MHz, CDCl<sub>3</sub>) δ 8.31 (s, 1H), 7.23 (d, *J* = 8.5 Hz, 2H), 7.06 (d, *J* = 8.5 Hz, 2H), 2.39 (s, 3H). <sup>13</sup>C NMR (151 MHz, CDCl<sub>3</sub>) δ 159.4, 147.6, 135.9, 130.0, 120.6, 20.6.

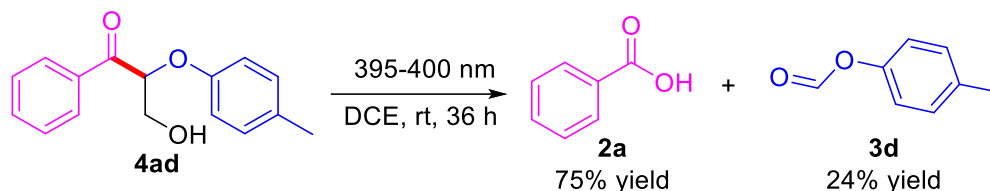

Lignin model compound **4ad**: <sup>1</sup>H NMR (400 MHz, CDCl<sub>3</sub>) δ 8.01 - 7.89 (m, 2H), 7.57 - 7.46 (m, 1H), 7.38 (dd, *J* = 8.4, 7.1 Hz, 2H), 6.94 (d, *J* = 8.6 Hz, 2H), 6.71 (d, *J* = 8.6 Hz, 2H), 5.43 (dd, *J* = 6.1, 4.1 Hz, 1H), 4.12 - 3.96 (m, 2H), 2.35 (s, 1H), 2.16 (s, 3H). <sup>13</sup>C NMR (101 MHz, CDCl<sub>3</sub>) δ 196.9, 155.1, 134.8, 133.9, 131.3, 130.1, 128.8, 128.7, 115.2, 81.3, 63.2, 20.4.

Lignin model compound **4ad** (25.6 mg, 0.10 mmol) was used under standard condition irradiated for 36 h at 395-400 nm. After worked up and purification, the corresponding cleaved products were afforded, benzoic acid **2a** (9.2 mg, 75% yield), phenyl formate **3d** (3.3 mg, 24% yield).

Product **2a**<sup>[1]</sup>: <sup>1</sup>H NMR (400 MHz, CDCl<sub>3</sub>) δ 8.34 - 8.12 (m, 2H), 7.76 - 7.62 (m, 1H), 7.62 - 7.48 (m, 2H). <sup>13</sup>C NMR (101 MHz, CDCl<sub>3</sub>) δ 172.5, 133.8, 130.2, 129.3, 128.5.

Product **3d**<sup>[4]</sup>: <sup>1</sup>H NMR (600 MHz, CDCl<sub>3</sub>) δ 8.31 (s, 1H), 7.23 (d, *J* = 8.5 Hz, 2H),

7.06 (d,  $J = 8.5$  Hz, 2H), 2.39 (s, 3H).  $^{13}\text{C}$  NMR (151 MHz,  $\text{CDCl}_3$ )  $\delta$  159.4, 147.6, 135.9, 130.0, 120.6, 20.6.

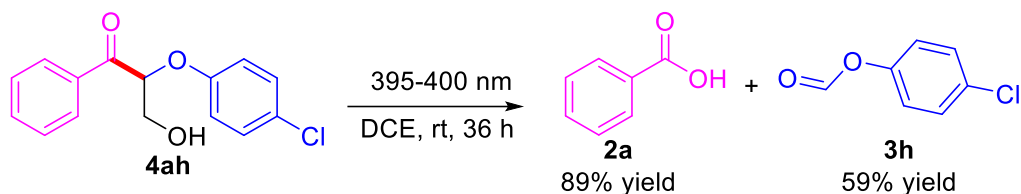

Lignin model compound **4ah**:  $^1\text{H}$  NMR (400 MHz,  $\text{CDCl}_3$ )  $\delta$  8.09 - 8.00 (m, 2H), 7.68 - 7.61 (m, 1H), 7.51 (t,  $J = 7.7$  Hz, 2H), 7.22 (d,  $J = 8.9$  Hz, 2H), 6.84 (d,  $J = 8.9$  Hz, 2H), 5.56 (dd,  $J = 6.1, 3.9$  Hz, 1H), 4.20 (dd,  $J = 12.1, 3.9$  Hz, 1H), 4.13 (dd,  $J = 12.1, 6.1$  Hz, 1H), 2.18 (s, 1H).  $^{13}\text{C}$  NMR (101 MHz,  $\text{CDCl}_3$ )  $\delta$  196.1, 155.8, 134.5, 134.2, 129.6, 129.0, 128.6, 126.9, 116.6, 81.4, 63.2.

Lignin model compound **4ah** (27.7 mg, 0.10 mmol) was used under standard condition irradiated for 36 h at 395-400 nm. After worked up and purification, the corresponding cleaved products were afforded, benzoic acid **2a** (10.9 mg, 89% yield), phenyl formate **3h** (9.2 mg, 59% yield).

Product **2a**<sup>[1]</sup>:  $^1\text{H}$  NMR (400 MHz,  $\text{CDCl}_3$ )  $\delta$  8.34 - 8.12 (m, 2H), 7.76 - 7.62 (m, 1H), 7.62 - 7.48 (m, 2H).  $^{13}\text{C}$  NMR (101 MHz,  $\text{CDCl}_3$ )  $\delta$  172.5, 133.8, 130.2, 129.3, 128.5.

Product **3h**<sup>[4]</sup>:  $^1\text{H}$  NMR (600 MHz,  $\text{CDCl}_3$ )  $\delta$  8.28 (s, 1H), 7.41 - 7.36 (m, 2H), 7.13 - 7.08 (m, 2H).  $^{13}\text{C}$  NMR (151 MHz,  $\text{CDCl}_3$ )  $\delta$  158.7, 148.2, 131.7, 129.6, 122.5.

### 3.7 Gram-Scale reaction and solvent-recycling reaction

The substrate  $\beta$ -O-4 ketone lignin model compound **1aa** (2.12 g, 10 mmol) was dissolved in DCE (100 mL) in a random bottom flask. The reaction mixture was then stirred at room temperature with the irradiation under 395-400 nm light (20W, 2 cm distance). The process of the reaction was monitored by TLC and GC-MS (about 36 h). Upon completion, the solution was distilled directly and 82.5 mL DCE was recovered. Then the residue was purified by silica gel chromatography with petroleum ether (PE)/ethyl acetate (EtOAc) as mobile phase to afford the benzoic acid 0.732 g (60% yield).

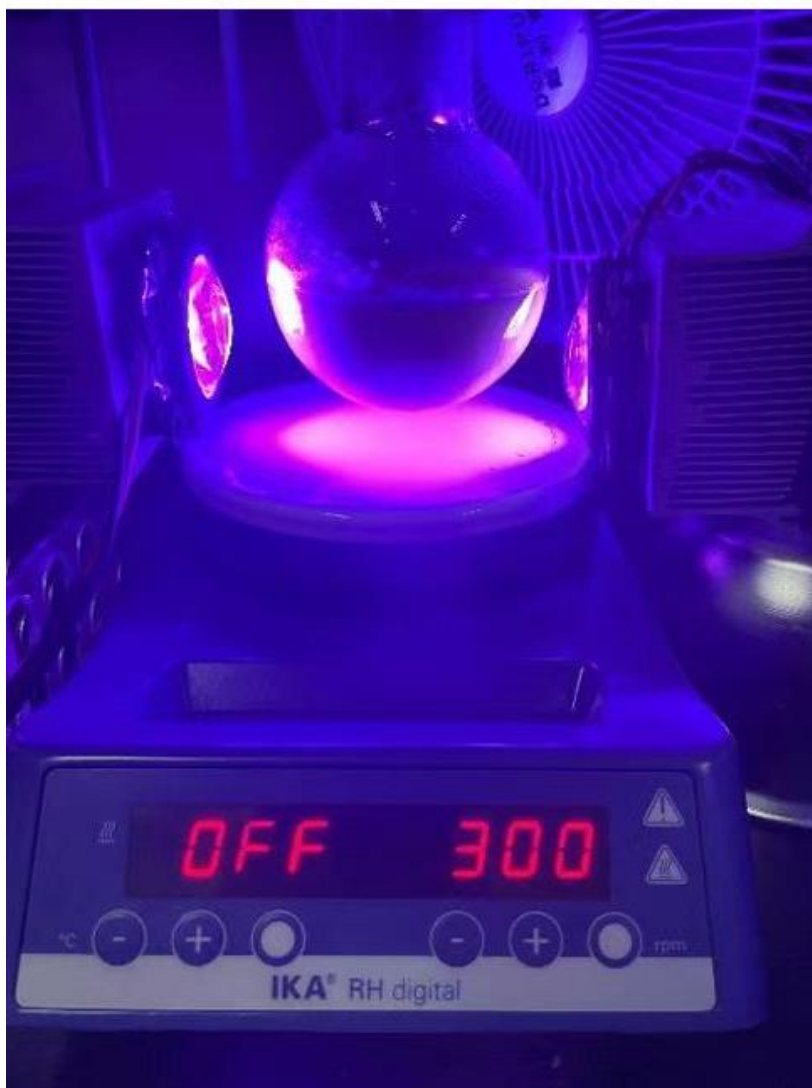

**Figure S7.** Gram-Scale reaction of **1aa**.

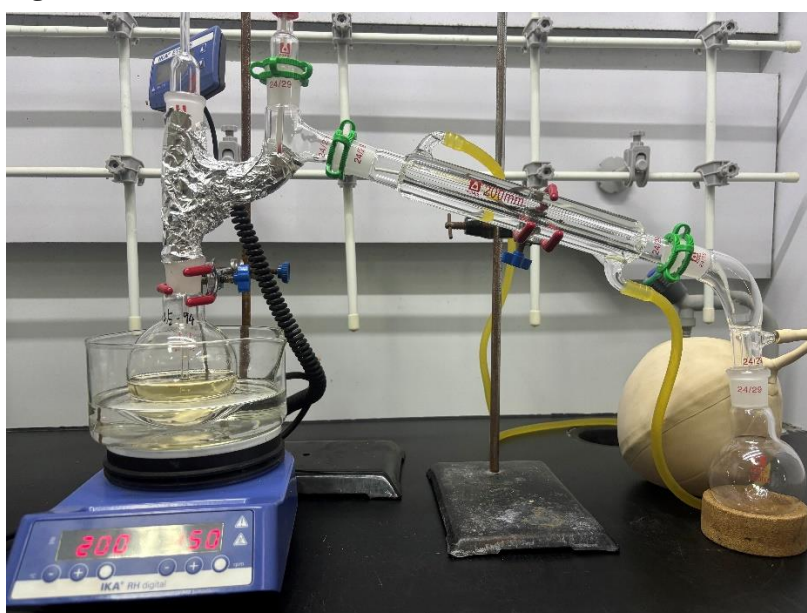

**Figure S8.** DCE-recycling reaction.



#### 4. References

- [1] Zhang, G., Zhang, Z., Zeng, R. *Chin. J. Chem.* **2021**, 39, 3225–3230.
- [2] Ueda, T., Konishi, H., Manabe, K. *Org. Lett.* **2012**, 14, 3100–3103.
- [3] Gazi, S. Hung N. Wilson K., Ganguly, R., Putra M., Adhitya M., Hirao, H., Soo, H. S., *Chem. Sci.*, **2015**, 6, 7130–7142
- [4] Katafuchi, Y., Fujihara, T., Iwai, T., Terao, J., Tsuji, Y. *Adv. Synth. Catal.* **2011**, 353, 475–482.
- [5] Zhu, X., Liu, Y., Liu, C., Yang, H., Fu, H. *Green Chem.* **2020**, 22, 4357–4363.
- [6] Kalmode, H. P., Vadagaonkar, K. S., Shinde, S. L., Chaskar, A. *J. Org. Chem.* **2017**, 82, 3781–3786.
- [7] a) Vyas V. K., Bhanage B. M. *Tetrahedron: Asymmetry*, 2017, 28, 974–982. b) Wang M., Li L. H., Lu J. M., Li H. J., Zhang X. C., Liu H. F., Luo N. C., Wang F. *Green Chem.*, **2017**, 19, 702–706.



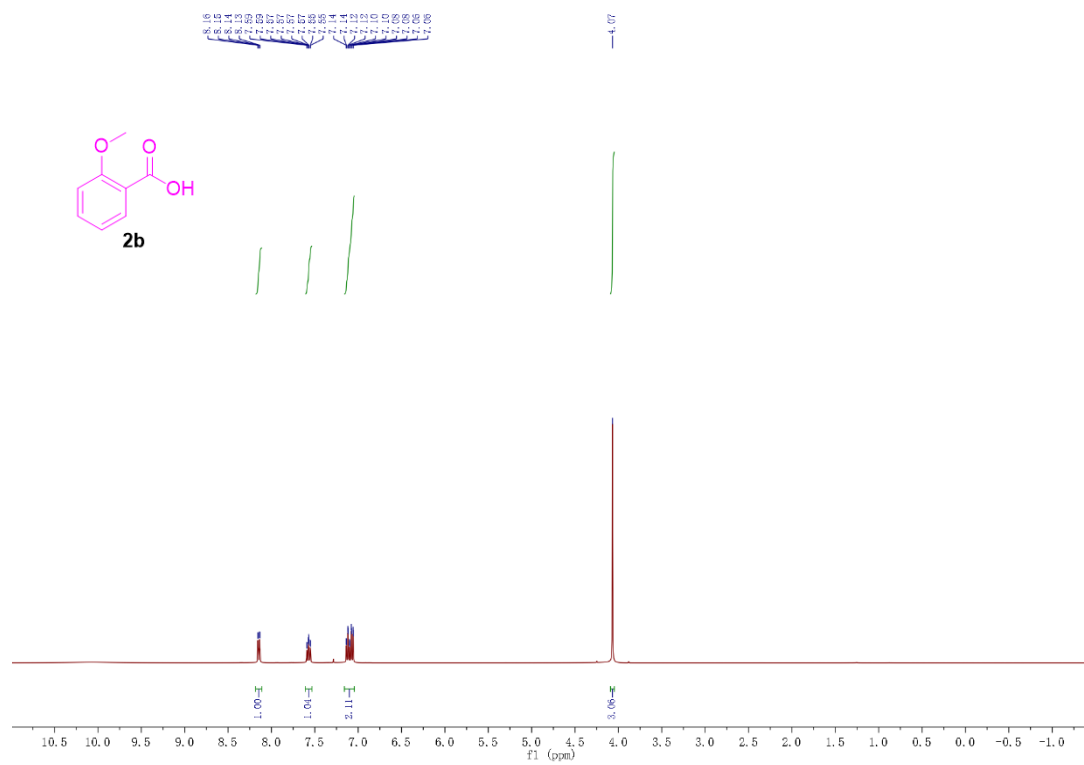

<sup>1</sup>H NMR of 2b

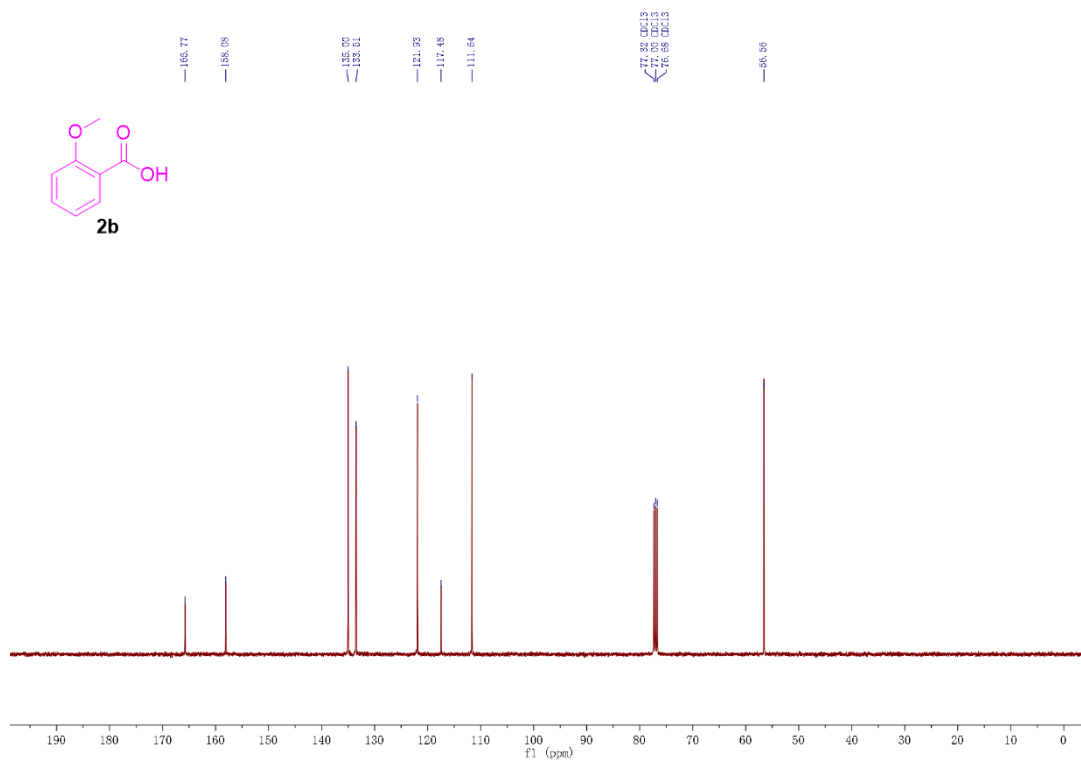

<sup>13</sup>C NMR of 2b

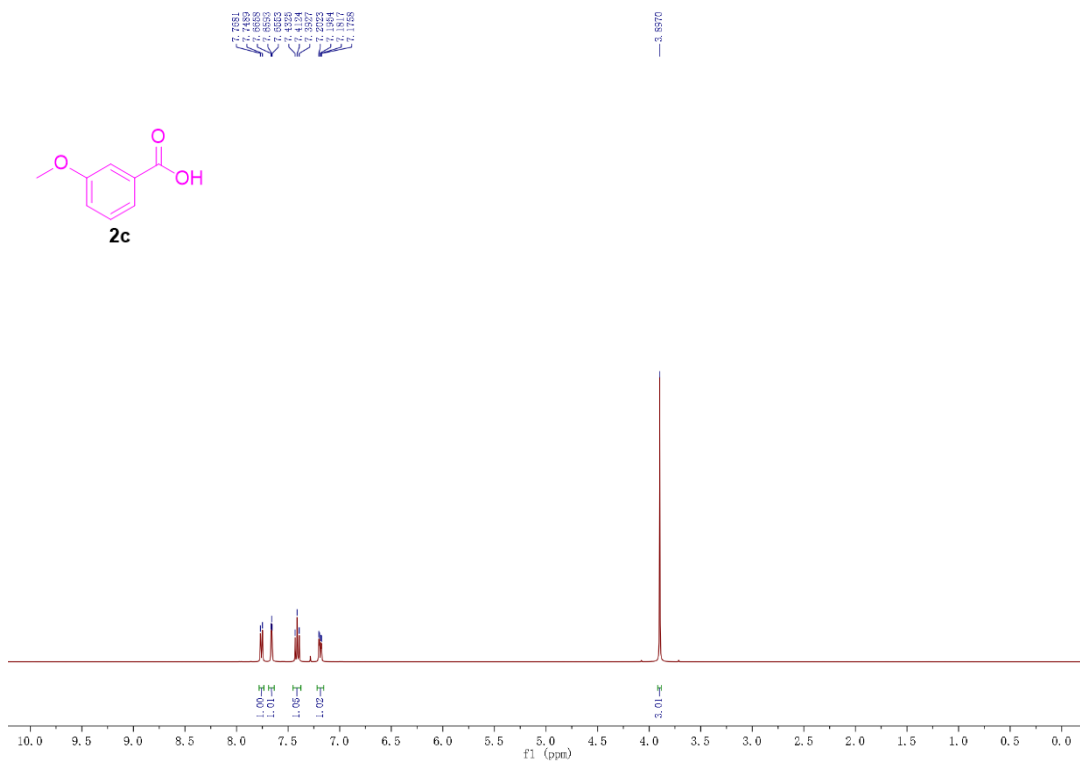

<sup>1</sup>H NMR of **2c**

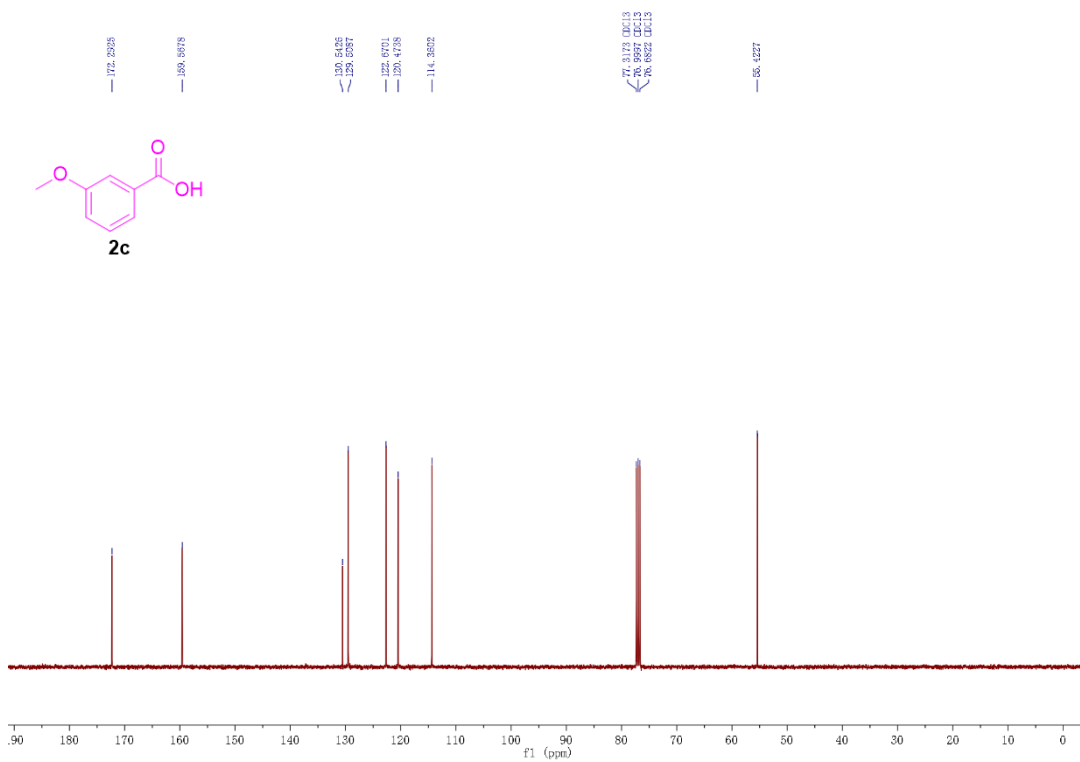

<sup>13</sup>C NMR of **2c**

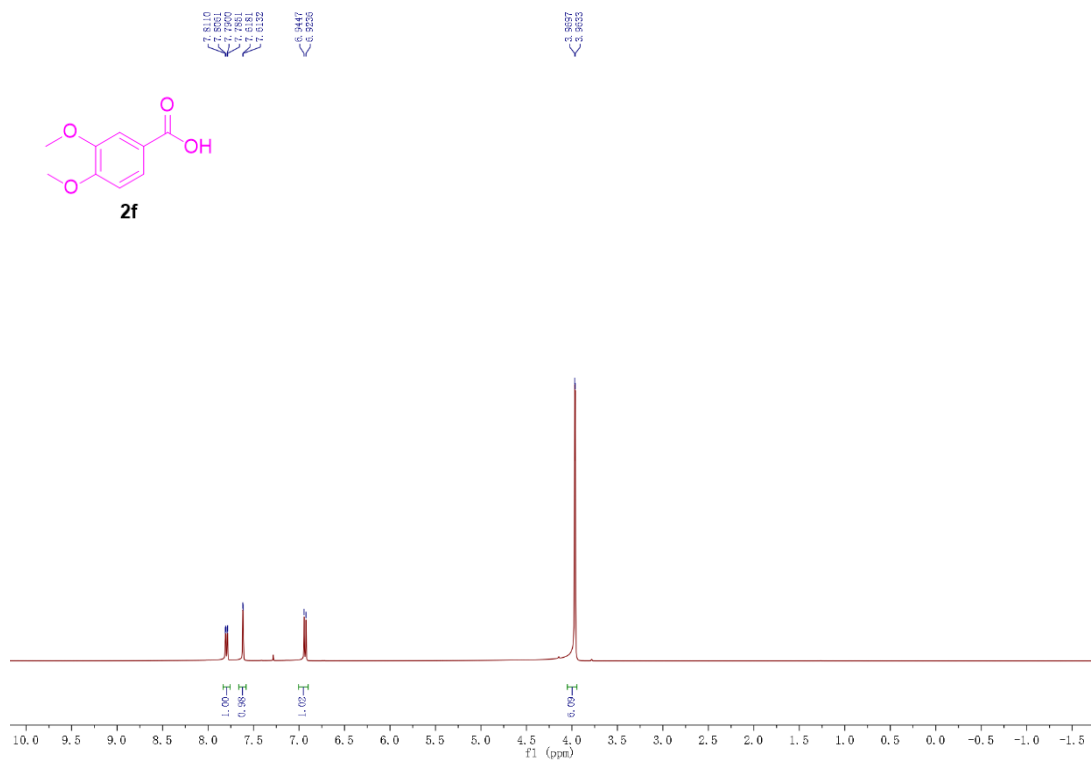

$^1\text{H}$  NMR of **2f**

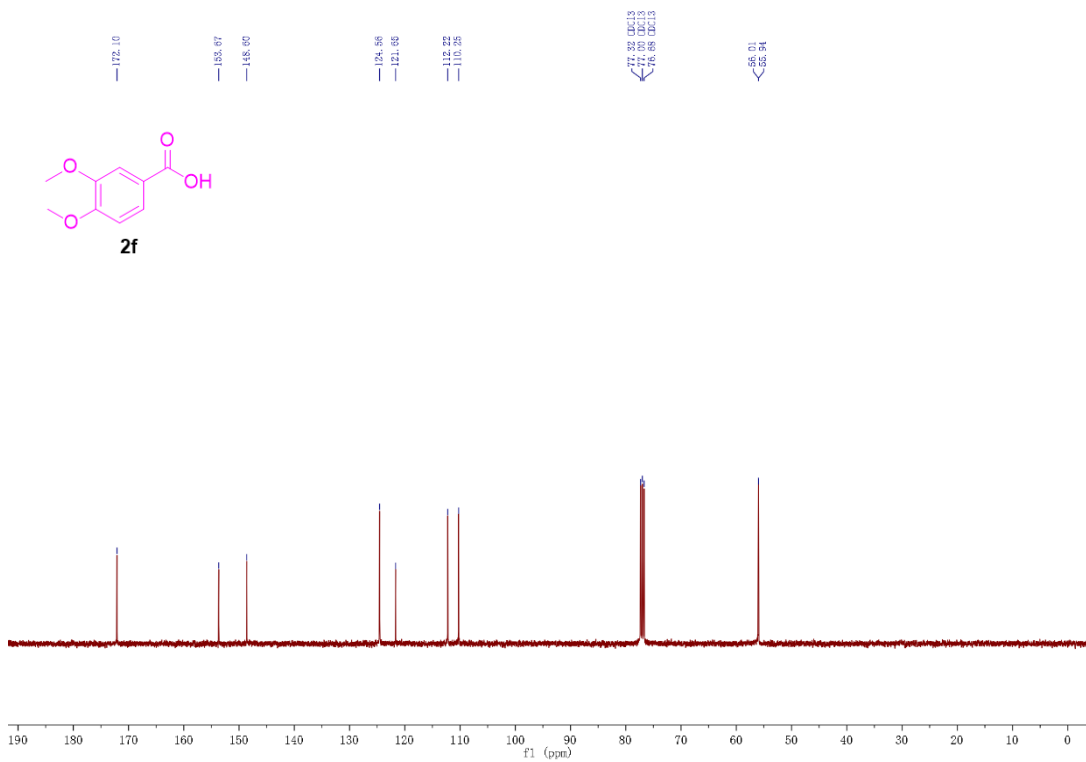

$^{13}\text{C}$  NMR of **2f**

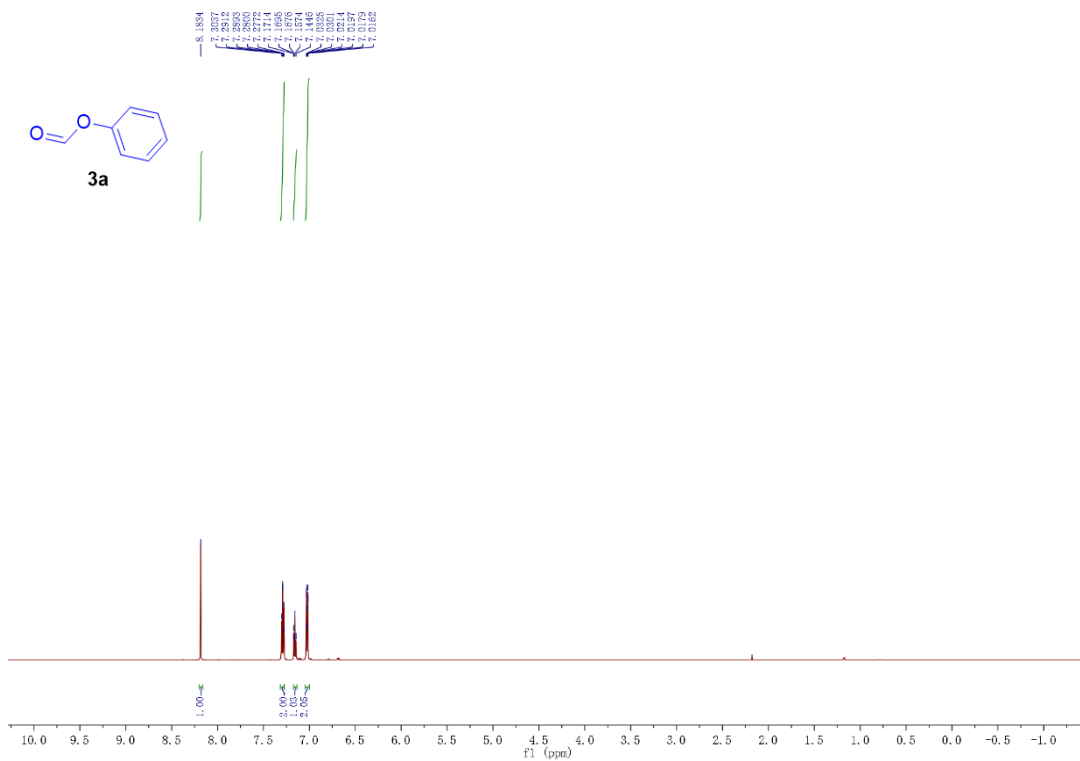

**<sup>1</sup>H NMR of 3a**

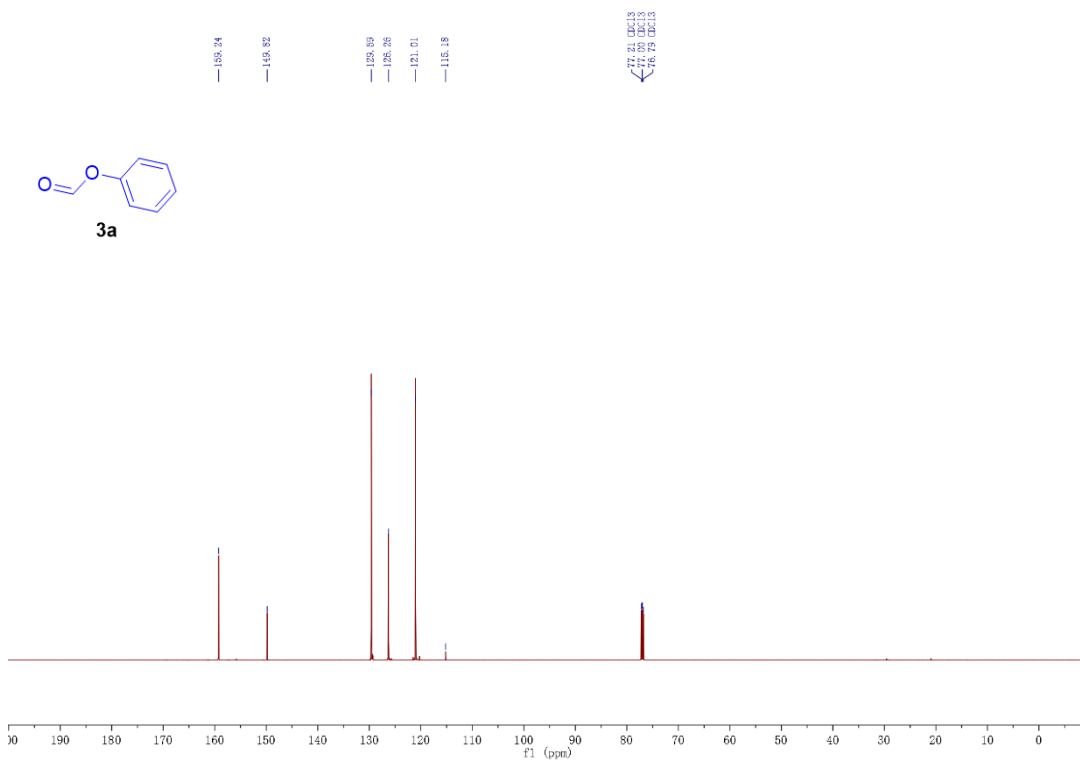

**<sup>13</sup>C NMR of 3a**

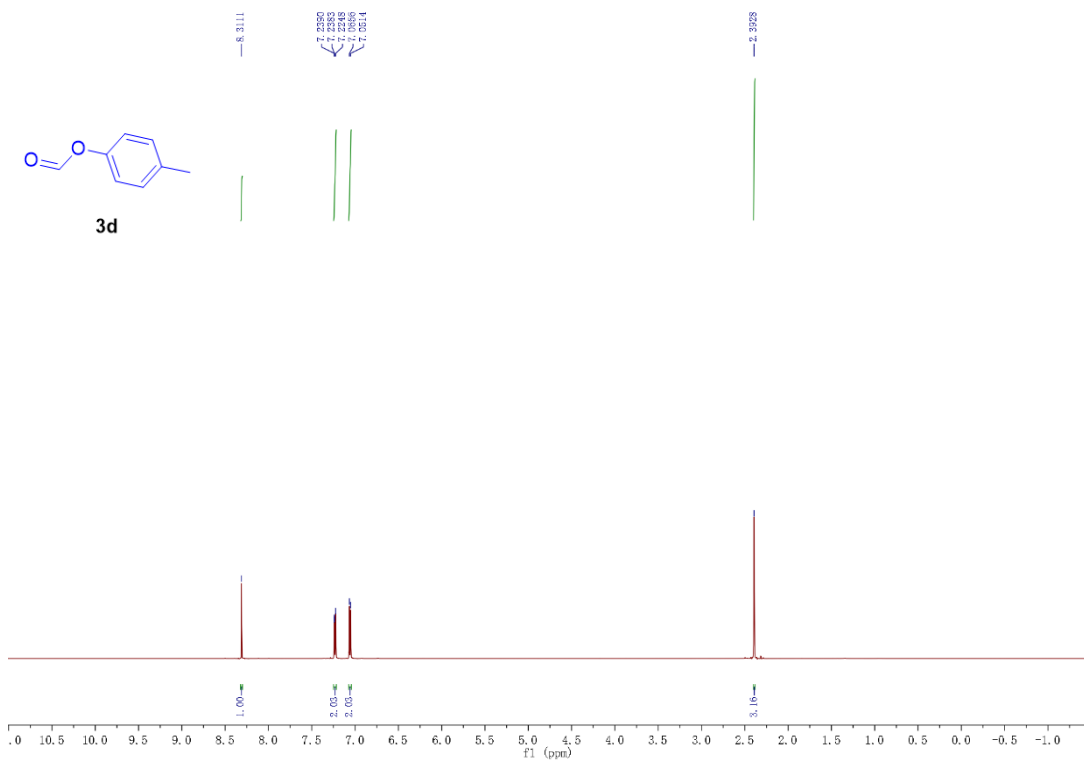

$^1\text{H NMR}$  of **3d**

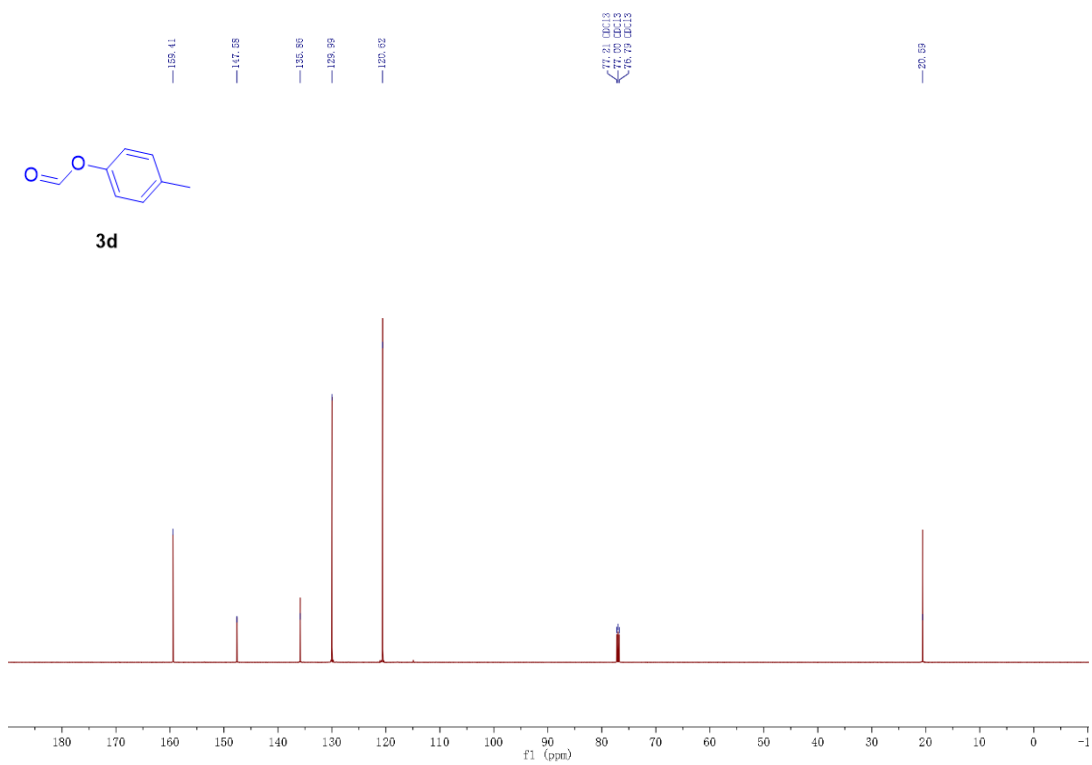

$^{13}\text{C NMR}$  of **3d**

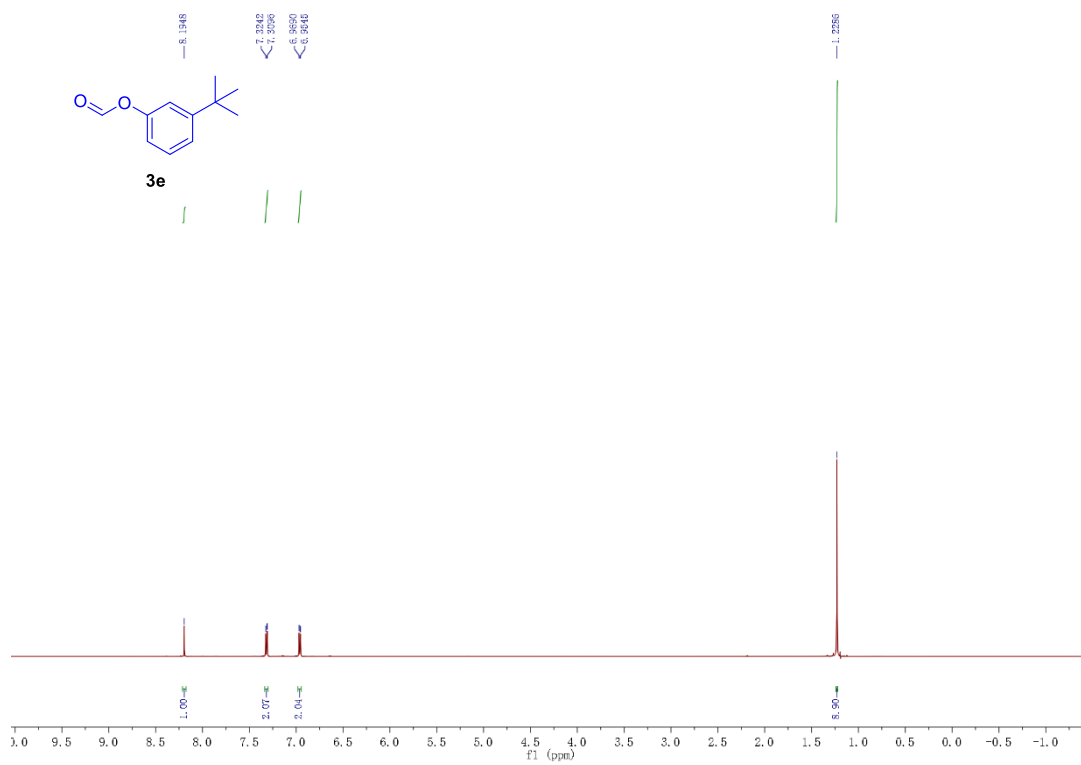

<sup>1</sup>H NMR of **3e**

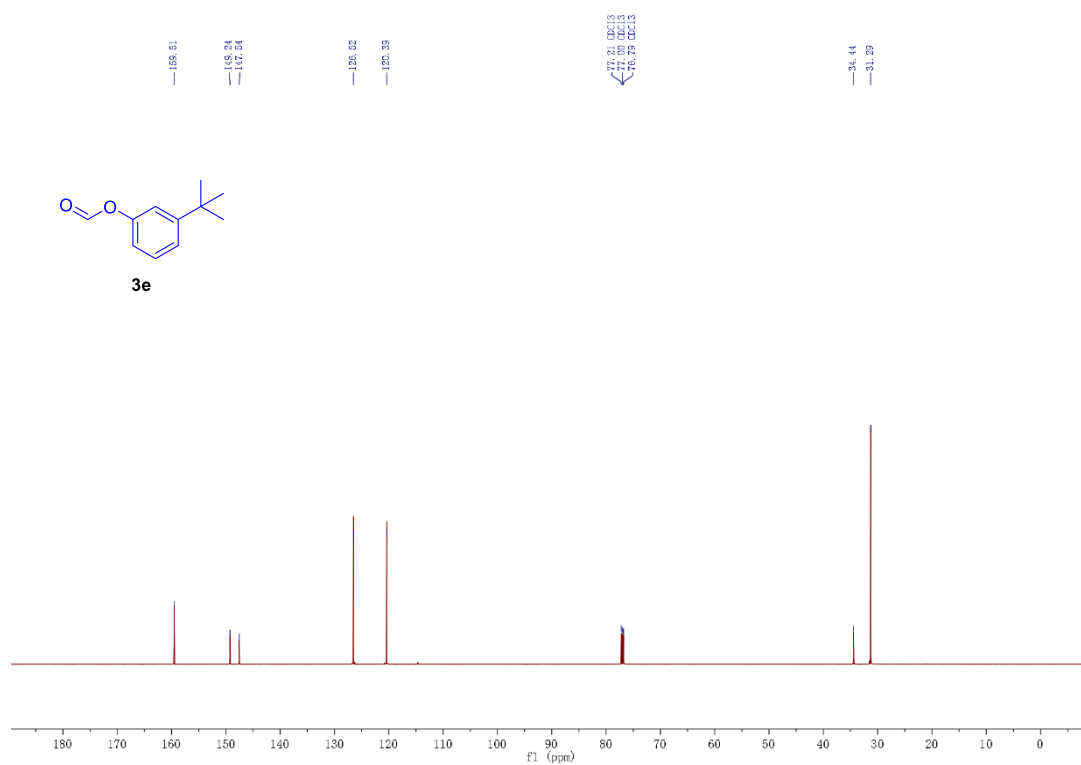

<sup>13</sup>C NMR of **3e**



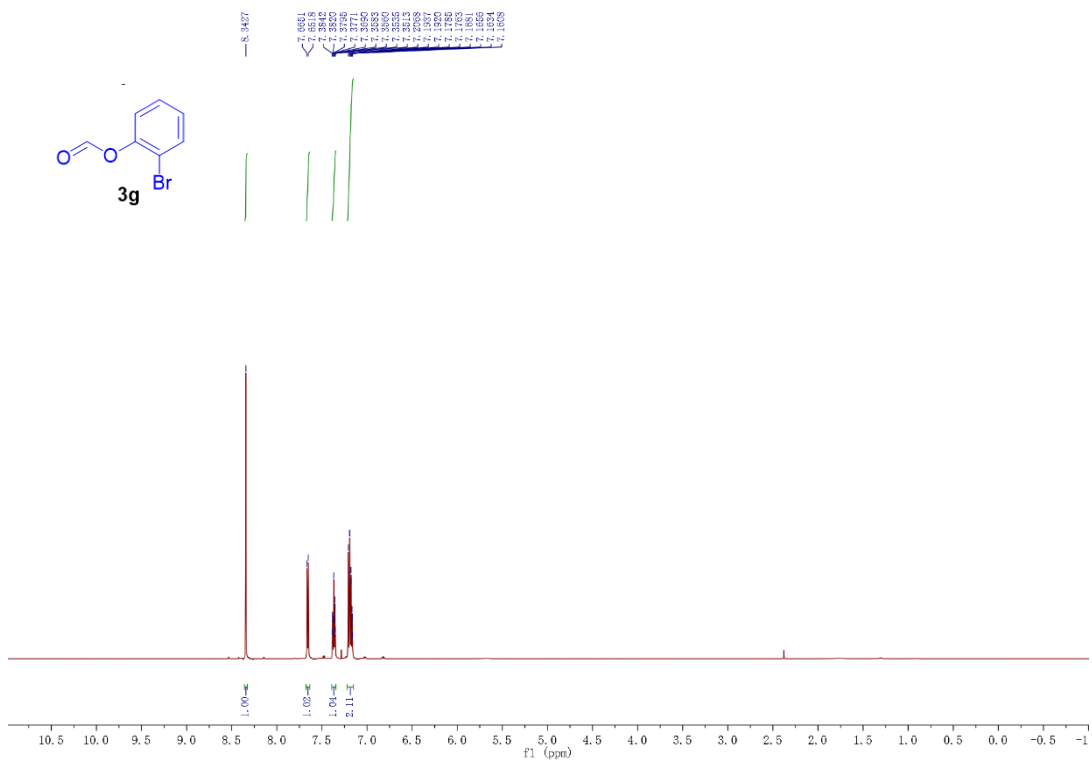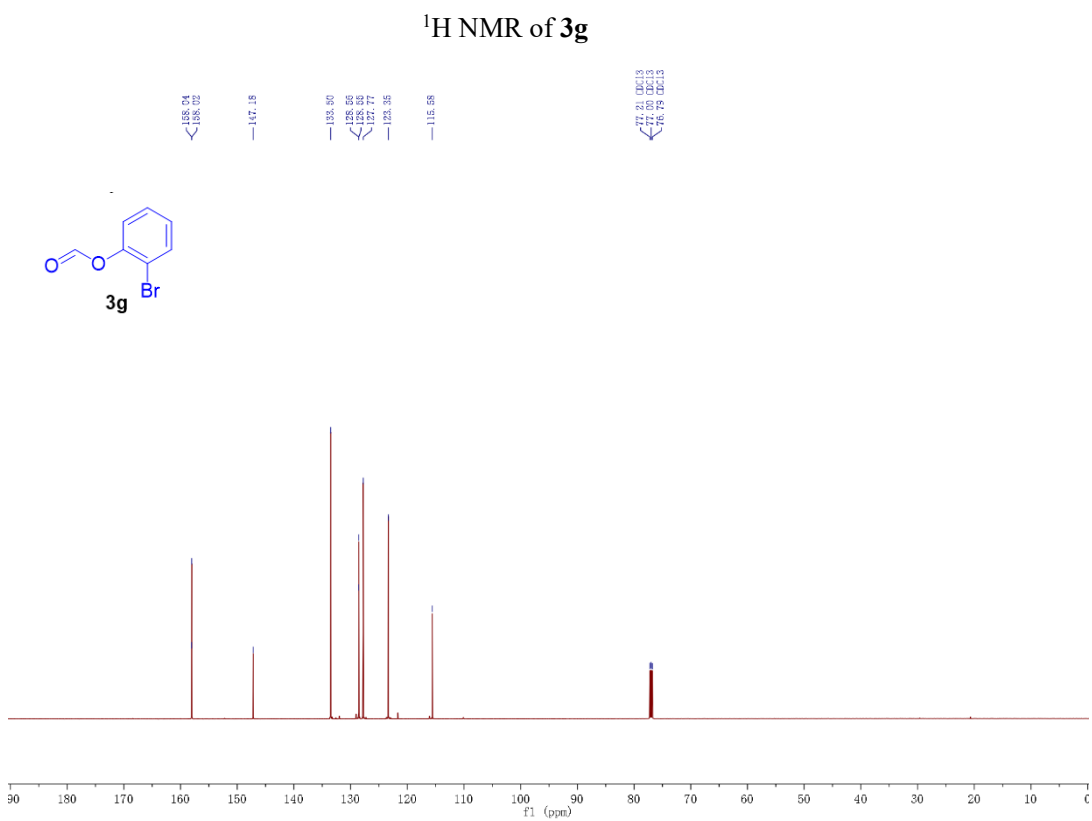

Supplement: d4gc05578k1.pdf [file d4gc05578k1.pdf]
